Wall et al., *submitted*

1 **Shifting Baselines: Physiological legacies contribute to the response of reef coral to**  
2 **frequent heat waves**

3

4 Christopher B. Wall<sup>1,2\*</sup>, Contessa A. Ricci<sup>3</sup>, Alexandra D. Wen<sup>1,4</sup>, Bren E. Ledbetter<sup>3</sup>, Delania E.  
5 Klinger<sup>3</sup>, Laura D. Mydlarz<sup>3</sup>, Ruth D. Gates<sup>1</sup>, Hollie M. Putnam<sup>5</sup>

6

7 <sup>1</sup>University of Hawai‘i at Mānoa, Hawai‘i Institute of Marine Biology, PO Box 1346, Kāne‘ohe,  
8 HI 96744, USA

9 <sup>2</sup>Pacific Biosciences Research Center, University of Hawai‘i at Mānoa, 1933 East West Road,  
10 Honolulu, HI 96816, USA

11 <sup>3</sup>University of Texas at Arlington, Department of Biology, Arlington, TX 76019, USA

12 <sup>4</sup>University of Miami, Rosenstiel School of Marine and Atmospheric Science, Miami, FL 33149,  
13 USA

14 <sup>5</sup>University of Rhode Island, Department of Biological Sciences, Kingston, RI USA

15

16 \*corresponding author: [chris.wall@hawaii.edu](mailto:chris.wall@hawaii.edu)

17

18

19 Key words: immunity, physiology, El Niño, bleaching, Symbiodiniaceae

20

21

22

23

24 **Abstract**

- 25 1. Global climate change is altering coral reef ecosystems. Notably, marine heat waves are  
26 producing widespread coral bleaching events that are increasing in frequency, with  
27 projections for annual bleaching events on reefs worldwide by mid-century.
- 28 2. The response of corals to elevated seawater temperatures can be modulated by abiotic  
29 factors at site of origin and dominant endosymbiont type, which can result in a shift in  
30 multiple coral traits and drive physiological legacy effects that influence the trajectory of  
31 reef corals under subsequent thermal stress events. It is critical, therefore, to evaluate the  
32 potential for shifting physiological and cellular baselines driven by these factors in *in situ*  
33 bleaching (and recovery) events. Here, we use the back-to-back regional bleaching  
34 events of 2014 and 2015 in the Hawaiian Islands and subsequent recovery periods to test  
35 the hypothesis that coral multivariate trait space (here termed physiotype, sensu (Van  
36 Straalen, 2003) shift in multiple bleaching events, modulated by both environmental  
37 histories and symbiotic partnerships (Symbiodiniaceae).
- 38 3. Despite fewer degree heating weeks in the first-bleaching event relative to the second (7  
39 vs. 10), bleaching severity in a dominant reef building coral on Hawaiian reefs,  
40 *Montipora capitata*, was greater (~70% vs. 50% bleached cover) and differences due to  
41 environmental history (reef site) were more pronounced. Melanin, an immune cytotoxic  
42 response, provided an initial defense during the first event, potentially priming  
43 antioxidant activity, which peaked in the second-bleaching event (i.e., a legacy effect).  
44 While magnitude of bleaching differed, immune response patterns were shared among  
45 corals harboring heat-sensitive and heat-tolerant Symbiodiniaceae. This supports a  
46 pattern of increased constitutive immunity in corals resulting from repeat bleaching

Wall et al., *submitted*

47 events, with greater specialized enzymes (catalase, peroxidase, superoxide dismutase)  
48 and attenuated melanin synthesis.  
49 4. This study demonstrates bleaching events have implications for reef corals beyond  
50 shaping their ecological assemblages. These events can change the magnitude and/or  
51 identity of response variables contributing to physiotype, thus generating physiological  
52 legacies carried over into the future. Quantifying baseline coral physiotypes and tracking  
53 their shifts will be critical to understanding and forecasting the effects of increased  
54 bleaching frequency on coral biology and ecology in the Anthropocene.

55

56

57

58

59 **1. Introduction**

60 Environmental change at local and global scales is degrading coral reef ecosystems. Notably,  
61 long-term trends in ocean warming and punctuated marine heat waves are destabilizing the  
62 symbiosis between corals and their endosymbiont algae (Symbiodiniaceae) and increasing coral  
63 bleaching events (Hughes et al., 2018a). The cumulative impacts of these episodic heat waves  
64 not only shift ecological and functional baselines (Hughes et al., 2019; McWilliam, Pratchett,  
65 Hoogenboom, & Hughes, 2020), but may also have legacy effects on coral biology, such that  
66 responses to bleaching events can be modulated by prior exposure (e.g., Brown, Dunne,  
67 Goodson, & Douglas, 2000). It is growing increasingly clear that susceptibility to bleaching in  
68 reef corals is based on the interaction of environmental histories (Brown et al., 2000; Safaie et  
69 al., 2018) and holobiont traits, including endosymbiont communities and genetics and  
70 physiology of the coral host (Barshis et al., 2013; Palmer, Bythell, & Willis, 2010; Palumbi,  
71 Barshis, Traylor-Knowles, & Bay, 2014; Sampayo, Ridgway, Bongaerts, & Hoegh-Guldberg,  
72 2008).

73

74 Thermotolerant Symbiodiniaceae can confer bleaching resistance in some corals (Sampayo et al.,  
75 2008), and the Hawaiian coral *Montipora capitata* exhibits reduced bleaching when dominated  
76 by *Durusdinium* as opposed to *Cladocopium* Symbiodiniaceae (Cunning, Ritson-Williams, &  
77 Gates, 2016). However, corals are metaorganisms, and host properties such as constitutive  
78 immunity (Palmer, 2018a) and antioxidant capacity (Barshis et al., 2013) are also central to  
79 maintaining cellular homeostasis and preventing bleaching mortality (Palmer et al., 2010). As  
80 such, immunological processes are implicated as targets for natural selection and are integral to  
81 the future of reef-building corals in the face of climate change (Mydlarz, McGinty, & Harvell,

Wall et al., *submitted*

82 2010; Palmer, 2018a; Pinzón, Beach-Letendre, Weil, & Mydlarz, 2014). The nexus of these  
83 influential properties of coral stress responses – symbiont community and host immunity – and  
84 their role in repetitive natural bleaching and recovery events remains to be fully understood,  
85 especially with respect to the role of environmental history (Palumbi et al., 2014; Safaie et al.,  
86 2018). As global climate change increases the frequency and severity of coral bleaching events  
87 (Hughes et al., 2018), understanding the symbiotic, immune, and antioxidant responses of corals  
88 will be central to understanding the cumulative and latent effects of bleaching on the function of  
89 reef corals through time and enhancing our capacity to project community responses to thermal  
90 stress events.

91  
92 The widely documented recent major bleaching of the Great Barrier Reef (2016-2017) reduced  
93 coral cover by >50% (Stuart-Smith, Brown, Ceccarelli, & Edgar, 2018), altered coral (Hughes et  
94 al., 2018b) and fish (Robinson, Wilson, Jennings, & Graham, 2019) assemblages, and disturbed  
95 the stock-recruitment capacity of reef corals (Hughes et al., 2019). As climate change continues  
96 to intensify, it is now critical to track shifts in the biology and function of corals through  
97 examination of multivariate trait-space, defined as ‘physiotypes’ by Van Straalen (2003; e.g.,  
98 Figure 1a), the term which we use throughout this manuscript. Trait-space approaches have  
99 recently been applied to track changes in reef coral communities and their representative trait  
100 diversity following bleaching (Hughes et al., 2018b; McWilliam et al., 2020), and the generation  
101 of physiotype time series data will provide a critical match to further understand and interpret the  
102 growing collection of coral reef ecological time series datasets (De’ath, Fabricius, Sweatman, &  
103 Puotinen, 2012; Edmunds et al., 2014; Edmunds et al., 2014; McClanahan, Ateweberhan, &  
104 Omukoto, 2007). Together, these timeseries will allow us to integrate across cellular, ecological

105 and evolutionary scales and improve our mechanistic understanding of these scale linkages.  
106 Importantly, tracking of multiple, interactive coral physiological traits provides the opportunity  
107 to reveal the potential for beneficial acclimatization or negative legacy effects that may underlie  
108 shifts in physiotype (e.g., Figure 1a) and testable mechanistic hypotheses underpinning resistance  
109 or susceptibility to repeated stress (Figure 1b).

110

111 This integrative multivariate approach to tracking coral performance was utilized to test specific  
112 hypotheses regarding targeted response variables and the linkage between environmentally-  
113 driven physiological, symbiotic, and cellular (i.e., antioxidants, immunity) legacies as  
114 mechanisms underpinning bleaching outcomes (Palmer et al., 2010; Palmer & Traylor-Knowles,  
115 2012; Venn, Loram, & Douglas, 2008). Both the host and symbiont have enzymatic defenses to  
116 mitigate oxidative stress (e.g., peroxidase, catalase, superoxide dismutase) (Venn et al., 2008)  
117 caused by host (e.g., heat-damaged mitochondrial membranes, Dunn et al., 2012) and symbiont  
118 (e.g., damage to the D1 protein of photosystem II (PSII)) (Jones, Hoegh-Guldberg, Larkum, &  
119 Schreiber, 1998; Lesser, 1997) sources, ultimately leading to apoptosis and dysbiosis when  
120 severe enough (Weis, 2008) (Figure 1b). Thermal stress also triggers host immune responses  
121 (Mydlarz, Couch, Weil, Smith, & Harvell, 2009; Mydlarz et al., 2010; Pinzón et al., 2015), and  
122 higher constitutive immunity (i.e., immune activity necessary for cellular homeostasis) reduces  
123 coral thermal sensitivity and disease susceptibility (Palmer et al., 2010). In addition, the  
124 melanin-synthesis pathway is an important component of host immunity that is active in wound  
125 healing and pathogen invasion while also serving as a photoprotectant that may mitigate  
126 bleaching stress (Mydlarz & Palmer, 2011; Palmer et al., 2010) (Figure 1b). However, corals  
127 may mount different cellular mechanisms to combat bleaching due to energetic requirements

Wall et al., *submitted*

128 (Fuess, Mann, Jinks, Brinkhuis, & Mydlarz, 2018; Palmer, 2018b; Pinzón et al., 2015), stress  
129 frequency (i.e. acute, chronic, repeated stress) (Ainsworth et al., 2016; Schoepf et al., 2015), or  
130 as a function of histories of biotic and abiotic challenges that modulate constitutive immunity  
131 (Mydlarz et al., 2009; Palmer, 2018b; Wall et al., 2018). For instance, there is evidence corals  
132 may rely on different antioxidant and immunity mechanisms based on their environmental  
133 histories, as lower melanin synthesis and higher antioxidant activity was observed in heat-  
134 stressed corals from a reef with high pCO<sub>2</sub>-variability compared to low pCO<sub>2</sub>-variability (Wall et  
135 al., 2018). Thus, pairing the measurement of bleaching metrics like cell density and chlorophyll  
136 concentrations with immune and antioxidants provides a powerful and tractable approach within  
137 a multivariate integrative framework.

138

139 The Hawaiian Islands, once thought to be a bleaching refuge for corals (Jokiel & Brown, 2004),  
140 experienced severe bleaching in 2014 and 2015 across the populated Main and remote  
141 Northwestern Hawaiian Islands (Bahr, Rodgers, & Jokiel, 2017; Couch et al., 2017). In  
142 Kāneʻohe Bay, Oʻahu, Hawaiʻi, 7.1 degree heating weeks (DHW) were observed in 2014 and  
143 10.2 DHW in 2015, beginning in August and July, respectively (*see Methods*), resulting in  $45 \pm$   
144  $2\%$  (mean  $\pm$  SE) bleaching in the first event and  $30 \pm 4\%$  bleaching in the second (Bahr et al.,  
145 2017). An ecologically dominant reef coral, *Montipora capitata* (Dana 1846), showed  
146 significant bleaching in both events (Figure 2a), with differences in bleaching responses  
147 observed at the site and event level.

148

149 Using the opportunity presented by these natural bleaching events (Figure 2), we tracked coral  
150 percent bleaching and phenotypes using a multivariate trait-space approach. We quantified the

Wall et al., *submitted*

151 response of *M. capitata* in Kāneʻohe Bay to the back-to-back bleaching events of 2014 and 2015  
152 (i.e., bleaching in October 2014, recovery in February 2015, bleaching in October 2015, and  
153 recovery in February 2016) at two Kāneʻohe Bay reefs (Lilipuna and Reef 14) with contrasting  
154 environmental histories relating to seawater residence (10 – 20 d vs. >30 d), pCO<sub>2</sub> variability (ca.  
155 300 vs. 600 μatm pCO<sub>2</sub> diel flux), and proximity to shore (Drupp, De Carlo, Mackenzie,  
156 Bienfang, & Sabine, 2011; Drupp et al., 2013; Lowe, Falter, Monismith, & Atkinson, 2009).  
157 We predicted that: (H1) immunity and antioxidant contributions to bleaching responses will  
158 influenced by site environmental histories and symbiont communities such that greater bleaching  
159 prevalence and attenuated immune responses will be observed in corals from the high variable-  
160 pCO<sub>2</sub> site (Reef 14) and those association with thermally sensitive Symbiodiniaceae. We also  
161 expected (H2) immunity and antioxidant activity would not occur with the same magnitude or  
162 trajectory after repeated bleaching events due to legacy effects shaping acclimatory or stress  
163 response pathways over time. Considering the wide-ranging functions of melanin in host  
164 immunity (Palmer et al., 2008, 2010), we expected melanin synthesis to act as an acute and  
165 broad-spectrum defense in physiologically stressed corals, with antioxidants having a more  
166 specialized response after chronic or repeat bleaching stress. Finally, while the thermal tolerance  
167 of symbiont communities is vital to coral bleaching sensitivity, evidence for differential  
168 immunity or antioxidant capacities in coral holobionts associated with thermally tolerant  
169 symbiont species is lacking. Given that the coral *M. capitata* is known to be dominated by two  
170 genetically and physiologically contrasting Symbiodiniaceae, *Cladocopium* sp. and *Durusdinium*  
171 *glynnii* (Cunning et al., 2016; Wall, Kaluhiokalani, Popp, Donahue, & Gates, 2020), we  
172 predicted (H3) that holobionts harboring heat-tolerant *D. glynnii* would show higher immune and  
173 antioxidant responses linked to greater bleaching resistance. To test these hypotheses, we



Wall et al., *submitted*

174 measured bleaching severity and recovery at each location using benthic surveys and measured  
175 coral traits in coral fragments, including: physiological measurements of cellular bleaching  
176 magnitude (symbiont density, areal- and cell-specific chlorophyll *a*, holobiont total protein and  
177 total biomass), and completed enzymatic assays for mechanisms contributing to bleaching  
178 resistance through coral host antioxidant capacity (peroxidase, catalase, superoxide dismutase),  
179 and the host immune response of the melanin cascade (prophenoloxidase, melanin). This  
180 approach allows for a more holistic description of coral physiotype that we tracked through two  
181 bleaching and recovery periods.

182

## 183 **2. Materials and Methods**

### 184 *2.1 Site description*

185 Coral bleaching and recovery at two reef systems: a fringing reef (hereafter, ‘Lilipuna’  
186 [21°25’36.8”N, 157°47’24.0”W]) in southern Kāne‘ohe Bay adjacent to the Hawai‘i Institute of  
187 Marine Biology (HIMB) on Moku o Lo‘e, and an inshore patch reef (hereafter, ‘Reef 14’  
188 [21°27’08.6”N, 157°48’04.7”W]) in central Kāne‘ohe Bay. These reefs sites were chosen due to  
189 their unique environmental history of seawater pCO<sub>2</sub> and hydrodynamics (Drupp et al., 2013;  
190 Wall et al., 2018). Seawater pCO<sub>2</sub> adjacent to the both locations (fringing reef at Lilipuna and  
191 the patch reef Reef 14) is comparable (ca. 450 μatm), however, diel pCO<sub>2</sub> flux is significantly  
192 higher (196 – 976 μatm pCO<sub>2</sub>) in central Kāne‘ohe Bay near Reef 14 relative to the Bay’s  
193 southern basin proximate to Lilipuna (225 – 671 μatm) (P. Drupp et al., 2011; Drupp et al.,  
194 2013).

195

### 196 *2.2 Environmental monitoring*

Wall et al., *submitted*

197 Temperature (Hobo pendants,  $\pm 0.53$  °C accuracy, 0.14 °C resolution, Onset Computer Corp.,  
198 Bourne, MA) and photosynthetic active radiation (PAR) loggers (Odyssey, Dataflow Systems  
199 Limited, Christchurch, New Zealand) were placed at Lilipuna and Reef 14 at a depth of 1 m.  
200 Loggers were periodically removed from the reef, cleaned, and replaced monthly. Temperature  
201 and PAR were recorded continuously at 15 min intervals from October 2014 – February 2016,  
202 however, gaps in environmental data do exist as a consequence of instrument failure and loss.  
203 Gaps in logger temperature data were supplemented with NOAA temperature data from the  
204 Moku o Lo'e station at HIMB (NOAA, 2019). PAR loggers were calibrated against a LI-1400  
205 quantum meter (Li-Cor, Lincoln, Nebraska, USA) attached to a cosine LI-192 underwater  
206 quantum sensor. Temperature loggers were calibrated with a certified digital thermometer (5-  
207 077-8,  $\pm 0.05$  °C accuracy, Control Company, USA) and cross-calibrated against each other for  
208 standardization. Degree heating weeks (DHW) for the southern portion of Kāne'ōhe Bay where  
209 our corals were collected were calculated in R using *in situ* Moku o Lo'e temperature data  
210 (NOAA, 2019), with the difference between mean half-week temperatures (i.e., mean hourly  
211 temp over 3.5 d) and the maximum monthly mean temperature of 27.7 °C, (Jokiel & Brown,  
212 2004)] to determine 'hotspots'. DHW were determined as the number of hotspots  $>1$  across a  
213 rolling 12 weeks window (i.e., 24 half-weeks) (NOAA, 2020). DHW for windward O'ahu and  
214 the Hawaiian Islands during the 2014 and 2015 bleaching events have been previously reported  
215 (Bahr et al., 2017; Sale, Marko, Oliver, & Hunter, 2019). The purpose of our calculations are to  
216 quantify the incurred heat stress using empirical calculation of DHW from temperature data  
217 collected proximate to our two reef locations.

218

219 *2.3 Benthic surveys and coral collections*

Wall et al., *submitted*

220 Four sampling periods were identified as corresponding to a ‘bleaching period’ following the  
221 point of maximum thermal stress (10 October 2014 and 12 October 2015) and a post-bleaching  
222 ‘recovery period’ approximately 4 months after peak seawater warming (11 February 2015 and  
223 26 February 2016). In each time period, benthic surveys were conducted at each reef site using a  
224 20 m transect and a line-point-intersect at 1 m intervals. Transects were positioned parallel to  
225 natural contours of the reef, being the north-south axis of the fringing reef (Lilipuna) and the  
226 east-west axis of patch reef (Reef 14). At each reef, transects ( $n = 2$ ) were placed along the reef  
227 crest (1 – 2 m), and benthic community cover was recorded at the species level for reef corals  
228 (*Montipora capitata*, *Pocillopora* spp. [*P. acuta*, *P. damicornis*], *Porites compressa*), and either  
229 crustose coralline algae (CCA), macroalgae, or sand/bare/turf. For corals, bleaching state was  
230 quantified categorically, being either non-bleached (i.e., appearing fully pigmented), or bleached  
231 (i.e., exhibiting degrees of tissue paling/pigment variegation or being wholly white). *M. capitata*  
232 cover was calculated as the proportion of total benthic cover, and *M. capitata* bleaching extent  
233 was calculated as proportion of total *M. capitata* colonies bleached. The relative position of  
234 transects at each reef was recorded to allow for repeat surveys within the same general location  
235 at each reef across survey periods.

236

237 In each sampling period, coral branch tips (<4 cm length) were collected from forty *M. capitata*  
238 coral colonies ( $n = 1$  fragment colony<sup>-1</sup>) along the reef crest at each reef site at a depth of ca. 1 m  
239 (State of Hawai‘i Department of Land and Natural Resources, Special Activity Permit 2015-17  
240 and 2016-69). Immediately post collection, corals were snap-frozen in liquid nitrogen and  
241 returned to HIMB and stored at -80 °C. While remaining frozen, each colony was split in half  
242 along its longitudinal axis. One-half of each coral fragment was stored at HIMB (-80 °C) until

Wall et al., *submitted*

243 processing for physiological assays and qPCR. The corresponding fragment-halves were used  
244 for immunological assays and were shipped to the University of Texas at Arlington using a dry-  
245 shipper charged with liquid nitrogen.

246

#### 247 *2.4 DNA extraction and symbiont community analysis*

248 Symbiodiniaceae DNA was extracted by adding an isolate of coral tissue (500  $\mu$ l) to 500  $\mu$ l DNA  
249 buffer (0.4 M NaCl, 0.05 M EDTA) with 2% (w/v) sodium dodecyl sulfate, following a modified  
250 CTAB-chloroform protocol (Cunning et al., 2016) ([dx.doi.org/10.17504/protocols.io.dyq7vv](https://doi.org/10.17504/protocols.io.dyq7vv)).

251 To determine the dominant genera of Symbiodiniaceae hosted by each *M. capitata* fragment, a  
252 quantitative PCR (qPCR) (Cunning et al., 2016) was used to amplify Symbiodiniaceae actin gene  
253 loci, with the corresponding number of actin gene copies in the Symbiodiniaceae genera

254 *Cladocopium* and *Durusdinium* (namely, ITS2 types C31, with C17 and C21 and D1-4-6  
255 [*Durusdinium glynnii* (Wham, Ning, & LaJeunesse, 2017)]) known to be numerically dominant

256 in Kāneʻohe Bay *M. capitata* (Cunning et al., 2016). Specificity of genus-level primers have  
257 been previously validated using a combination of Symbiodiniaceae internal transcribed spacer  
258 (ITS2) region of rDNA and actin gene sequencing (Cunning & Baker, 2013). Duplicate qPCR

259 reactions (10  $\mu$ l) were run for each coral sample using a StepOnePlus platform (Applied

260 Biosystems) set to 40 cycles, a relative fluorescence ( $\Delta R_n$ ) threshold of 0.01, and internal cycle  
261 baseline of 3 – 15. Symbiont genera detected in only one technical replicate were considered

262 absent. The relative abundance of *Cladocopium* and *Durusdinium* symbionts (i.e., C:D ratio) in  
263 each sample was determined from the ratio of amplification threshold cycles ( $C_T$ ) for

264 *Cladocopium* and *Durusdinium* (i.e.,  $C_T^C$ ,  $C_T^D$ ) using the formula  $C:D = 2^{(C_T^C - C_T^D)}$ , where

265 genus-specific  $C_T$  values are normalized according to gene locus copy number and fluorescence

Wall et al., *submitted*

266 intensity (Cunning et al., 2016). Coral colonies were determined to be *Cladocopium*- or  
267 *Durusdinium*-dominated based on numerical abundance (>0.5 proportion) of each genus from  
268 qPCR analysis (Innis, Cunning, Ritson-Williams, Wall, & Gates, 2018).

269

## 270 *2.5 Physiological metrics*

271 The extraction and processing of coral and symbiont tissues was performed following established  
272 methods (summarized in Wall et al., 2018). Briefly, coral tissue was removed from the skeleton  
273 using an airbrush filled with 0.2  $\mu\text{m}$  filtered seawater, yielding ~10 – 30 ml of tissue slurry.  
274 Extracted tissues were briefly homogenized and subsampled for the following physiological  
275 metrics: symbiont cell densities, chlorophyll *a* concentrations, protein biomass, and the total  
276 organic biomass determined from the ash-free dry weight (AFDW) of coral + algae tissues.  
277 Coral tissue slurries were stored at -20 °C.

278

279 All physiological metrics were normalized to the surface area ( $\text{cm}^2$ ) of coral skeleton using the  
280 paraffin wax-dipping technique (Stimson & Kinzie, 1991). Symbiont cell counts were measured  
281 by replicate cell counts ( $n = 6 - 10$ ) on a haemocytometer, and expressed as symbiont cells  $\text{cm}^{-2}$ .  
282 Chlorophyll *a* was quantified by concentrating algal cells through centrifugation ( $3,000 \times g$  for 3  
283 min) and extracting pigments in the algal pellet in 100% acetone for 36 h in darkness at -20 °C.  
284 Spectrometric absorbance were measured ( $\lambda = 630$  and 663 nm) using a 96-well quartz plate with  
285 two technical replicates; chlorophyll concentrations quantified using the equations for  
286 dinoflagellates (Jeffrey & Humphrey, 1975), normalized for path length and expressed as  $\mu\text{g}$   
287 chlorophyll *a*  $\text{cm}^{-2}$  and pg chlorophyll *a* symbiont cell $^{-1}$ . Total protein concentration (soluble +  
288 insoluble in the holobiont) was quantified using the Pierce BCA (bicinchoninic acid) Protein

Wall et al., *submitted*

289 Assay Kit (Pierce Biotechnology, Waltham, MA). Protein solubilization was achieved by adding  
290 1 M NaOH and heating (90 °C) for 60 min, followed by the neutralizing to ca. pH 7.5 with 1 N  
291 HCl. Protein was measured spectrophotometrically ( $\lambda = 562$  nm) in a 96-well plate with three  
292 technical replicates against a bovine serum albumin standard and expressed as mg protein cm<sup>-2</sup>.  
293 Total fraction of organic biomass was measured by drying a subsample of coral tissue at 60 °C  
294 (48 h) in pre-burned aluminum pans followed by burning in a muffle furnace (450 °C) for 4 h.  
295 The difference between the dried and burned masses is the AFDW and expressed as mg cm<sup>-2</sup>.

296

### 297 *2.6 Immunity and oxidative stress metrics*

298 Immunology and oxidative stress metrics were determined using previously published protocols  
299 for coral host tissues (Mydlarz et al., 2009; Mydlarz & Palmer, 2011; Palmer et al., 2011; Wall et  
300 al., 2018). A 3 – 4 ml aliquot of coral tissue slurry was obtained by airbrushing with our coral  
301 extraction buffer at pH 7.0 (100 mM TRIS buffer + 0.05 mM dithiothreitol). Tissue was  
302 homogenized for 1 min on ice (hand held homogenizer, Powergen 125, Fisher Scientific,  
303 Waltham, MA), and 1 ml of the resulting slurry was freeze-dried for 24 h (VirTis BTK freeze-  
304 dryer, SP Scientific, Warminster, PA) and used for melanin concentration estimates. The  
305 remaining slurry was centrifuged at 4 °C at 2,500 × g (Eppendorf 5810 R centrifuge, Hamburg,  
306 Germany) for 5 min to remove cellular debris and most Symbiodiniaceae cells to achieve a host-  
307 enriched cell-free extract. All colorimetric measurements were calculated using a Synergy 2  
308 multi-Detection microplate reader with Gen5 software (BioTek, Winooski, VT, USA). All assays  
309 were run in duplicate or triplicate on separate 96-well microtiter plates. Total protein  
310 concentration of each coral cell-free extract was determined using the RED660 protein assay (G  
311 Biosciences, Saint Louis, MO) with a bovine serum albumin standard curve.

312

313 To determine the concentration of melanin within each sample, the freeze-dried aliquots of  
314 weighed and dried tissue were gently vortexed with 400  $\mu\text{l}$  of 10 M sodium hydroxide (NaOH)  
315 and left to extract for 48 h. Samples were bead-beaten with 1 mm glass beads and then vortexed  
316 for 10 s and then centrifuged at  $7,000 \times g$  for 5min. For each sample, 65  $\mu\text{l}$  of supernatant were  
317 aliquoted in duplicate into a 96-well g-area microtiter plate (Greiner Bioone, Monroe, NC,  
318 USA). The plates were read at an absorbance of 490 nm and the concentration of melanin was  
319 determined using a standard curve (0 – 2 mg) of commercial melanin (Sigma-Aldrich, St. Louis,  
320 MO) dissolved in 10 M NaOH for 48 h and treated the same as the samples on each microtiter  
321 plate. Data presented are converted to mg melanin normalized to mg of tissue (Fuess et al.,  
322 2018).

323

324 PPO activity was determined for each sample using duplicate 20  $\mu\text{l}$  aliquots of coral cell-free  
325 extract in clear 96-well microtiter plates, with 50  $\mu\text{l}$  of 10 mM phosphate buffered saline at pH  
326 7.0. To each well, 20  $\mu\text{l}$  of trypsin (0.2 mg  $\text{ml}^{-1}$  concentration in deionized filtered water) was  
327 added to activate PPO and the reaction was initiated by the addition of 20  $\mu\text{l}$  of 25 mM L-1,3-  
328 dihydroxyphenylalanine (L-DOPA; Sigma-Aldrich). The absorbance at 490 nm was measured  
329 over 25 min and the change in absorbance during the linear portion of the reaction (typically 10 –  
330 15 min) was normalized to mg protein and time for each sample ( $\Delta\text{Abs}_{490 \text{ nm}} \text{ mg protein}^{-1} \text{ min}^{-1}$ )  
331 <sup>1</sup>) (Mydlarz & Palmer, 2011; Fuess et al., 2018).

332

333 Coral host oxidative stress was determined by measuring the scavenging activity of the coral  
334 cell-free extracts to different substrates comparable to the antioxidants: peroxidase (POX),

Wall et al., *submitted*

335 catalase (CAT), and superoxide dismutase (SOD). Peroxidase activity (EC 1.11.1.7) was  
336 determined for each sample using 10  $\mu\text{l}$  aliquots of coral cell-free extract, in duplicate within 96-  
337 well microtiter plates, diluted with 50  $\mu\text{l}$  phosphate buffer (pH6.0). To each well, of 25  $\mu\text{l}$  of 25  
338 mM guaiacol in 10 mM PBS (pH 6.0) was added and the reaction was initiated with the addition  
339 of 12.5  $\mu\text{l}$  of 25 mM  $\text{H}_2\text{O}_2$  high purity 30% hydrogen peroxide ( $\text{H}_2\text{O}_2$ ; Sigma Aldrich). Guaiacol  
340 is a phenolic compound with scavenging properties that is commonly used as a substrate for  
341 peroxidase activity (Mydlarz & Harvell, 2007). The absorbance was read at 470 nm every min  
342 for 15 min and the change over time was calculated for the linear part of the reaction (0 – 10  
343 min) and normalized to mg protein in each sample the units for peroxidase activity are ( $\Delta\text{Abs}_{470}$   
344  $\text{nm mg protein}^{-1} \text{min}^{-1}$ ) (Mydlarz & Harvell, 2008).

345

346 Catalase activity (EC 1.11.1.6) was determined using the  $\text{H}_2\text{O}_2$  depletion assay using 10  $\mu\text{l}$  coral  
347 cell free extract and 50  $\mu\text{l}$  of 10 mM of pH 6.0 phosphate buffered saline (PBS) in duplicate  
348 wells of a UV-transparent 96-well microtiter plate. The assay was activated by the addition of  
349 10  $\mu\text{l}$  25 mM  $\text{H}_2\text{O}_2$ . The absorbance was measured at 240 nm over 15 min and the change in  
350 absorbance over time (e.g., initial - final) was calculated for the linear part of the reaction  
351 (typically 0 – 8 min) and converted to  $\mu\text{mol H}_2\text{O}_2$  using a standard curve of known  
352 concentrations, normalized per mg protein. CAT activity is presented as  $\mu\text{mol H}_2\text{O}_2$  scavenged  
353  $\text{mg protein}^{-1} \text{min}^{-1}$  (Palmer et al., 2011).

354

355 Superoxide dismutase (EC 1.15.1.1) activity was calculated using the SOD Assay Determination  
356 Kit-WST (Fluka, Switzerland) which includes Dojindo's highly water-soluble tetrazolium salt,  
357 WST-1(2-(4-iodophenyl)-3-(4-nitrophenyl)-5-(2,4-disulfophenyl)-2H-tetrazolium, monosodium



Wall et al., *submitted*

358 salt), that produces a water-soluble formazan dye with an absorbance peak at 450 nm upon  
359 reduction with superoxide anion. 10  $\mu$ L of extract was incubated with WST-1 and xanthine  
360 oxidase, which produces superoxide anion. Inhibition of absorbance at 450 nm (scavenging of  
361 the superoxide anion) was monitored in wells containing coral extracts and SOD standards and  
362 compared to untreated samples. One SOD unit of activity (U) equates to 50% inhibition of  
363 superoxide anion, and data are presented as SOD U mg protein<sup>-1</sup> (Krueger et al., 2015).

364

### 365 *2.7 Statistical analysis*

366 Permutation analysis of variance (PERMANOVA) and non-metric multidimensional scaling  
367 (NMDS) were performed using a balanced matrix of all physiology and immunity/antioxidant  
368 responses ( $n = 10$  responses) in the package *vegan* (Oksanen et al., 2019). PERMANOVA used  
369 a scaled and centered matrix with Euclidean calculations of pairwise distances using *adonis2*.  
370 The NMDS data matrix was double standardized using a Wisconsin and square root  
371 transformation with a euclidean distance using *metaMDS*. Response variables showing  
372 significant correlations ( $p < 0.05$ ) with NMDS axes were plotted as vectors using *envfit* command  
373 in *vegan*. Coral ‘physiotypes’ were defined by convex hulls, with borders defined by the range  
374 of points in the multivariate trait space (i.e., NMDS1 and NMDS2). Physiotypes were grouped  
375 categorically by periods, or the interactions of Site, Symbiont, and Period. Physiotype centroids  
376 used in trajectory plots were calculated as the mean of NMDS1 and NMD2 for each category.

377

378 Ecological benthic data (*M. capitata* total cover and bleached cover) were tested in a linear  
379 model with Periods (two bleaching and two recovery events) and Sites (Lilipuna, Reef 14) as  
380 fixed effects. Physiology, antioxidant, and immunity response variables were analyzed using a

Wall et al., *submitted*

381 linear model with Periods, Sites, and Symbiont community composition (*Cladocopium*- or  
382 *Durusdinium*-dominated) as fixed effects. Normal distribution and equal variance assumptions  
383 of ANOVA were examined by graphical representation of residuals and quantile:quantile plots.  
384 Where assumptions were not met, Box-Cox tests were performed (Box & Cox, 1964) and data  
385 transformations applied in the package *MASS* (Venables & Ripley, 2002). Analysis of variance  
386 tables for linear models were generated using type-II sum of squares with multiple comparisons  
387 using the package *emmeans* (Lenth, 2019). All analyses were performed in *R* version 3.6.1 (R  
388 Core Team, 2019). All data and code to generate figures and perform analyses are archived and  
389 openly available at Github ([https://github.com/cbwall/Gates-Mydlarz-bleaching-](https://github.com/cbwall/Gates-Mydlarz-bleaching-recovery/releases/tag/v4)  
390 [recovery/releases/tag/v4](https://github.com/cbwall/Gates-Mydlarz-bleaching-recovery/releases/tag/v4)).

391

### 392 **3. Results**

393 Coral cover at the two sites ranged from (mean  $\pm$  SD)  $63 \pm 11\%$  to  $93 \pm 11\%$  from 2014-2016.  
394 Greater total bleached coral cover was observed in the first bleaching event ( $62 - 75 \pm 9\%$ )  
395 relative to the second ( $43 - 55 \pm 16\%$ ) (i.e., during thermal stress) (Figure 2). Mean *M. capitata*  
396 cover was stable across time at Lilipuna ( $\sim 40\%$ ) but was much more variable at Reef 14, falling  
397 from  $91 \pm 4\%$  in October 2014 to  $51 \pm 7\%$  in February 2016. In the two bleaching events  
398 (October 2014 and 2015) greater bleaching of *M. capitata* corals was observed at Reef 14,  
399 compared to Lilipuna ( $p=0.020$ ).

400

401 PERMANOVA results testing effects of Period (bleaching event), Site (Lilipuna vs. Reef 14) and  
402 dominant Symbiodiniaceae species (*Cladocopium* sp. or *D. glynnii*) revealed significant  
403 differences of all main effects ( $p<0.001$ ) and the interaction of Period-by-Site ( $p<0.001$ ) and

Wall et al., *submitted*

404 Period-by-Symbiont community ( $p < 0.001$ ) (Figure 3 and 4, Table 1). In each of the four  
405 periods, coral physiotypes occupied unique positions in multidimensional trait space (Figure 2),  
406 with the location and trajectories of coral physiotypes in each period principally being a function  
407 of symbiont community, and to a lesser extent, site of collection (i.e., environmental history and  
408 physiological legacy) (Figure 3, 4).

409 Physiotypes of bleached corals relative to recovered corals showed stronger separation in 2014-  
410 2015, which was apparent at both reef sites (Figure 3, top row) and paralleled patterns of greater  
411 bleaching prevalence in the first-bleaching event (Figure 2c). Similarly, site effects on coral  
412 physiotypes were most pronounced in the first bleaching event (Table 1, Figure 4). Despite  
413 greater bleaching at Reef 14 in October 2014 (Figure 2b), shifts in bleaching and recovery  
414 performance envelopes were most distinct at Lilipuna (Figure 4). At the physiological level,  
415 separation of physiotypes during and after thermal stress was driven by bleaching sensitivity and  
416 symbiont cells/chlorophyll concentrations ( $p < 0.001$ , Figure 4 & S2, Table S1). “Bleached”  
417 physiotypes observed in periods of temperature stress (October 2014 and 2015) generally aligned  
418 with colonies hosting the more thermally sensitive *Cladocopium* sp., although in the first event  
419 coral physiotypes at Reef 14 symbiont communities did not separate according to symbiont  
420 communities (Figure 4). Nevertheless, across all sampling periods *M. capitata* colonies  
421 dominated by *Durusdinium* symbionts had higher symbiont cell densities, less variable areal  
422 chlorophyll concentrations, and lower chlorophyll per symbiont cell (i.e., pg chlorophyll cell<sup>-1</sup>)  
423 compared to colonies dominated by *Cladocopium* symbionts ( $p < 0.001$ , Figure S2). While  
424 *Cladocopium* chlorophyll cell<sup>-1</sup> oscillated across bleaching-and recovery periods, *Durusdinium*  
425 pg chlorophyll cell<sup>-1</sup> remained stable ( $p = 0.010$ ) and was also slightly higher at Reef 14 relative to  
426 Lilipuna across all timepoints ( $p = 0.001$ , Table S1). Coral protein and total biomass was variable

Wall et al., *submitted*

427 across the study, but each showed positive correlations with *Durusdinium*-dominated  
428 physiotypes from Lilipuna in bleaching and recovery periods (Figure 4). Overall, protein was  
429 9% higher in *Durusdinium*-dominated colonies ( $p=0.031$ ) and 32% higher in Lilipuna corals  
430 during first bleaching (October 2014) but equivalent at all sampling points thereafter ( $p=0.002$ ).  
431 Total biomass was lower during recovery periods ( $p<0.001$ ) in addition to being 20 – 40% higher  
432 at Lilipuna compared to Reef 14 in all periods (except in February 2015 recovery) ( $p<0.001$ ) and  
433 ~30% higher in *Durusdinium*-dominated colonies during the second bleaching, but equivalent  
434 across all colonies in other periods ( $p=0.012$ ) (Figure S2).

435 Immunity and antioxidant metrics (i.e., MEL, PPO, POX, CAT, SOD) differed through time in  
436 response to repeat bleaching and recovery (Figure 3, Figure 4) ( $p<0.001$ ), while the  
437 environmental influence from the Sit and Symbiont communities were less pronounced (Figure  
438 S2, S3, and Table S1, S2). In the first event, corals responded to thermal stress by increasing  
439 melanin synthesis ( $p<0.001$ ) (with corresponding declines in PPO precursors) and increasing  
440 catalase ( $p<0.001$ ). During recovery, prophenoloxidase (*post-hoc*:  $p<0.001$ ) and superoxide  
441 dismutase increased (*post-hoc*:  $p<0.001$ ) as melanin and catalase declined (Figure 4, 5, S2, & S3,  
442 Table S1, S2). Notably, the melanin pathway increased in all corals in the 2014-bleaching event  
443 regardless of bleaching sensitivity (i.e., loss or retention of symbionts/chlorophyll), or symbiont  
444 community, and was a significant cellular response that shaped coral physiotypes in the first  
445 bleaching event (Figure 5, first row). Corals in the second bleaching experienced a 6-fold  
446 increase in melanin (October 2015 vs. February 2015) along with corresponding reductions in  
447 prophenoloxidase, however, melanin activity was significantly less compared to the high  
448 melanin activity observed in the first bleaching period (0.015 vs. 0.003 mg melanin mg tissue<sup>-1</sup> in  
449 first- versus second-bleaching period). Conversely to lower melanin in the second bleaching was

Wall et al., *submitted*

450 a peak in catalase activity, which reached its highest level in 2015 bleaching (*post-hoc*,  $p < 0.001$ )  
451 and was most pronounced in corals from Lilipuna compared to Reef 14 (*post-hoc*,  $p < 0.001$ )  
452 (Table S2). The peak in catalase during 2015 bleaching corresponded with the lowest observed  
453 peroxidase activity, particularly for *Cladocopium*-dominated colonies (*post-hoc*,  $p = 0.007$ ).  
454 Subsequently in the 2016 recovery period, catalase declined by ~70% and peroxidase activity  
455 doubled, reaching peak activity similar to those observed in time periods. In contrast to other  
456 immunity and antioxidant responses, superoxide dismutase showed a unique trajectory,  
457 increasing progressively through time with each sampling period, being at its highest constitutive  
458 activity after repeat bleaching in the 2016 recovery, which was double that observed in the first  
459 bleaching period (October 2014) ( $p < 0.001$ ). Similar to catalase, superoxide dismutase was also  
460 slightly higher in corals from Lilipuna compared to those at Reef 14 ( $p = 0.028$ ).

#### 461 **4. Discussion**

462 Ocean thermal anomalies are reshaping the structure and function of coral reefs the world over.  
463 Three mass bleaching events occurred since 2014 (Hughes et al., 2017), and climate models  
464 predict that by mid-century bleaching will be an annual phenomena (van Hooidonk, Maynard, &  
465 Planes, 2013). The stress responses of corals to ocean warming is based on a network of dynamic  
466 interactions at biological and environmental levels, that can influence how they respond to the  
467 physiological challenges posed by a warming planet (Suggett & Smith, 2019). Accordingly,  
468 there is a need for holistic measures of coral response that incorporate the influence of and  
469 environmental history (Palumbi et al., 2014) on physiological legacy effects. For example  
470 assessment of symbiont community (Suggett, Warner, & Leggat, 2017) and cellular memory  
471 (Brown, Dunne, Edwards, Sweet, & Phongsuwan, 2015) in the coral holobiont during and after  
472 thermal stress, to test for shifting physiological status that may ameliorate or exacerbate coral

Wall et al., *submitted*

473 bleaching. Thus, physiotype tracking – or multivariate physiological and molecular time series  
474 data – provide the capacity for identification of the cellular mechanisms that contribute to  
475 resilience, acclimatization, and/or resistance that can allow for better predictions of coral  
476 ecological responses to intensifying climate change and other regional disturbances (Vercelloni  
477 et al., 2020).

478 Symbiosis – via differential performance of genera and types (Sampayo et al., 2008; Stat et al.,  
479 2008) and the potential for switching and shuffling (Buddemeier & Fautin 1993; Baker et al.,  
480 2003) – provide one clear example of how environmental history can shift performance  
481 baselines. In this study, the role of dominant Symbiodiniaceae on holobiont physiotype was  
482 present, but the symbiont community effects were often Period- or Site-dependent. The high  
483 symbiont and chlorophyll *a* densities in *M. capitata* colonies dominated by *D. glynnii* across  
484 Periods aligns with the paradigm of high thermotolerance within the genus *Durusdinium*  
485 (Cunning et al., 2016; Lesser, Stat, & Gates, 2013; Silverstein, Cunning, & Baker, 2017; Wham  
486 et al., 2017). However, antioxidant and immunity metrics were equivalent in colonies differing  
487 in dominant symbiont partner, demonstrating negligible effects on antioxidant and immune traits  
488 counter to the expectation that these would be modulated by symbiont-derived bleaching  
489 resistance. In fact, this similarity was despite a greater loss of symbiont cells and  
490 photopigmentation in colonies dominated by *Cladocopium* relative to *Durusdinium*. Symbiont  
491 PSII photodamage is thought to lead the cascade of cellular events that culminate in bleaching  
492 (Weis, 2008). However, some Symbiodiniaceae (*Symbiodinium* sp., *Durusdinium trenchii*) have  
493 been shown to resist expulsion from the host despite incurring photodamage (Kemp et al., 2011;  
494 Silverstein et al., 2017). Therefore, host mechanisms regulating redox status may be equally  
495 important in coral thermal stress responses and decoupled from symbiont photophysiological

Wall et al., *submitted*

496 function (Krueger et al., 2015). In our study, the similarities observed between the antioxidant  
497 and immune responses of *Cladocopium*- and *Durusdinium*-dominated *M. capitata* colonies  
498 during both bleaching and recovery periods implicate an integral role of host mechanisms in  
499 coral responses to bleaching and recovery despite the presence of functionally distinct symbiont  
500 communities.

501 Shifts in physiotypes across bleaching and recovery periods were influenced by symbiont  
502 communities and the physical environment at each site, however, the significance of these  
503 predictors were not uniform across time and varied during first- and second-bleaching events.  
504 For instance, the effects of reef site were clear in the first event, possibly relating to greater  
505 bleaching in 2014, which reduced symbiont cells in both corals dominated by *Cladocopium* sp.  
506 and thermotolerant *D. glynii* at Reef 14. In the context of previous works, our data agrees with  
507 findings that DHW in Kāneʻohe Bay were lower in the first bleaching event relative to the  
508 second (5 – 7 DHW [2014] vs. 10 – 12 DHW [2015]) (Bahr et al., 2017), while the percentage of  
509 bleached coral cover was higher in 2014 at our study sites (70% [2014] vs. 50% [2015]) and in  
510 Kāneʻohe Bay as a whole (45 – 77% [2014] vs. 30 – 55% [2015]) (Bahr et al., 2017; Ritson-  
511 Williams & Gates, 2020) possibly due to greater cumulative temperature stress in 2014 (Bahr et  
512 al., 2017; Ritson-Williams & Gates, 2020). While this study and others agree that lower  
513 bleaching prevalence was observed in Kāneʻohe Bay during the second bleaching event, we  
514 show this corresponded with attenuated Site × Symbiont effects on coral physiotypes (Figure 4  
515 *bottom row*), suggesting a positive feedback between this interaction and bleaching severity.  
516 Therefore, the symbiont community harbored by corals is integral to bleaching responses and  
517 coral physiotypes (Suggett et al., 2017), but the relative importance of symbiont effects are also  
518 tempered by present environmental conditions and site-specific environmental histories.

Wall et al., *submitted*

519 Environmental conditions between Lilipuna and Reef 14 did not differ in terms of light  
520 availability, seawater temperature, or DHW (Figures 2 & S1). Nevertheless, the hydrodynamics  
521 between these reefs are substantial, producing considerable differences in seawater residence and  
522 pCO<sub>2</sub> variability (Drupp et al. 2011, 2013). In addition, the fringing reef habitat of Lilipuna with  
523 a close proximity to shore and silt-dominated backreef benthos is in stark contrast to Reef 14,  
524 which is patch reef pinnacle in the middle of the Kāneʻohe Bay lagoon. Together, the  
525 persistence of long-term hydrodynamic and biogeochemistry conditions between these reefs have  
526 manifested as physiological legacies in resident *M. capitata*, which we demonstrate influence the  
527 response of corals to regional bleaching events. In the laboratory, we showed *M. capitata* from  
528 Reef 14 exhibited greater antioxidant activity and  $F_v/F_m$  but lower melanin compared to Lilipuna  
529 colonies (Wall et al., 2018). We hypothesize these patterns observed in laboratory and field  
530 studies may be underpinned by energetic limitations due to pCO<sub>2</sub> histories. Immunity is  
531 energetically expensive (Palmer et al. 2018b) and studies show corals exposed to high-pCO<sub>2</sub>  
532 upregulate genes for energy reserve metabolism (Vidal-Dupiol et al., 2013) and can have lower  
533 lipid biomass compared to corals at ambient-pCO<sub>2</sub> (Wall, Mason, Ellis, Cunning, & Gates,  
534 2017). In this case flow and pCO<sub>2</sub>-history may be an important factor in the physiological  
535 legacies of Kāneʻohe Bay *M. capitata*, which had a greater impact on during the first bleaching  
536 event relative to the second.

537 Coral physiotypes are influenced by the physiological state and integrity of the coral-  
538 Symbiodiniaceae symbiosis, which includes (but is not limited to) pigmentation and symbiont  
539 densities. As expected, we observed symbiont loss/repopulation to drive changes in coral  
540 physiotypes between bleaching and recovery periods, and in support of our hypothesis, prior  
541 events had cumulative impacts on physiotype trajectories. Notably, coral physiotypes occupied



Wall et al., *submitted*

542 distinct spaces in each sampling period and showed changing trajectory through time (2014-  
543 2016) with the terminus of the trajectory in 2016-recovery resulting in a coral trait space  
544 intermediate between prior bleaching and recovery periods (Figure 1). These trajectories may be  
545 driven by those responses active in either the first or second bleaching-recovery periods (such as  
546 melanin), or by changes in constitutive immune activity that are cyclical (e.g., PPO and CAT), or  
547 continuously increasing through time (e.g., SOD). For instance, changes in total biomass  
548 generally declined in the aftermath of bleaching, being lower in recovery periods, but did not  
549 follow patterns in symbiont or photopigment concentrations. Coral tissue biomass also increased  
550 through time and was highest in the second year (on average pooled across all samples). The  
551 progressive increases in constitutive antioxidant activity exemplified by superoxide dismutase,  
552 may also have contributed to maintenance of biomass and therefore enhanced the potential for  
553 overall coral colony survival (Thornhill et al., 2011). Therefore, the moderate increase in tissue  
554 biomass through time, despite repeat stress events, may be a result of greater resilience in corals  
555 surviving repeat bleaching events, in addition to seasonal and stress-dependent fluctuations in  
556 coral tissue (Fitt, McFarland, Warner, & Chilcoat, 2000; Wall, Ritson-Williams, Popp, & Gates,  
557 2019).

558 The observed differences in antioxidant and immune activity in corals during repeat bleaching  
559 and recovery reveal that shifts in cellular priorities and mechanisms for dealing with bleaching  
560 stress exist, which ultimately shapes coral phenotypes and their trajectories through time and  
561 between stress states (Figure 5). In this case, increased catalase activity during bleaching may be  
562 linked to reactive oxygen and nitrogen species and increased host apoptosis-like pathways  
563 (Hawkins, Krueger, Becker, Fisher, & Davy, 2014; Krueger et al., 2015). Conversely, the  
564 accumulation of superoxide dismutase is decoupled from the onset and subsidence of thermal

Wall et al., *submitted*

565 stress seen in catalase. This response may reflect the “cellular memory” of corals to thermal  
566 stress, acting as a buffer to future oxidative stress (Barshis et al., 2013; Brown et al., 2015) to  
567 reduce bleaching effects while also contributing to greater tissue retention and post-bleaching  
568 survival. Both corals and Symbiodiniaceae have a broad array of superoxide dismutase isoforms  
569 (Krueger et al., 2015; Richier, Sabourault, & Courtiade, 2006), which can be used to combat  
570 reactive oxygen species originating from damage to photomachinery and host mitochondria that  
571 together can trigger apoptosis (Dunn et al., 2012). The persistent increase of superoxide  
572 dismutase through time thus suggests antioxidant “frontloading” (Barshis et al., 2013) is an  
573 important strategy used by corals during repetitive thermal stress to reduce damage.

574 Engagement of the melanin pathway (collectively here as the prophenoloxidase reservoir and the  
575 melanin product) is known to be an important generalized stress response for mitigating disease  
576 and thermal stress effects in corals (Mydlarz, Holthouse, Peters, & Harvell, 2008; Palmer et al.,  
577 2010; Wall et al., 2018). Likewise, exposure to thermal stress increases antioxidant activity in  
578 corals and Symbiodiniaceae (Gardner et al., 2017). In the first-bleaching event, the melanin  
579 pathway was observed as the primary cellular response to warming in all corals, regardless of  
580 bleaching sensitivity or symbiont community. This initial peak in melanin synthesis further  
581 supports the central role of this pathway as a generalized cellular response to periodic stress,  
582 including wound repair, disease, photodamage, and bleaching, and/or a photoprotective role to  
583 reduce excess excitation energy (Mydlarz et al., 2008; Palmer, Traylor-Knowles, Willis, &  
584 Bythell, 2011; Palmer et al., 2010; Wall et al., 2018). Its subsequent decline suggests the  
585 melanin cascade may i) prime the antioxidant response and no longer is required to act as a  
586 primary stress response role, or ii) had its capacity overwhelmed in the second-bleaching,  
587 resulting in corals primarily using antioxidant stress response mechanisms. Our findings are

Wall et al., *submitted*

588 more in line with the former. Under this thermal-priming hypothesis, sublethal thermal stress  
589 and high variable temperature regimes can contribute to protective mechanisms in the coral  
590 holobiont and bleaching resistance (Ainsworth et al., 2016; Barshis et al., 2013; Bellantuono,  
591 Granados-Cifuentes, Miller, Hoegh-Guldberg, & Rodriguez-Lanetty, 2012; Safaie et al., 2018).  
592 However, an increased frequency or magnitude of thermal stress may overcome acquired cellular  
593 responses (or symbiont partnerships) that support coral resistance to bleaching and mortality  
594 (Ainsworth et al., 2016).

595 In our study, the hierarchy of cellular stress responses shifts away from melanin-synthesis in  
596 favor of antioxidant activity (Figure 5), which may reflect the specialized nature of antioxidants  
597 in mitigating cellular damage and maintaining coral holobiont homeostasis (Murphy, Collier, &  
598 Richmond, 2019). Antioxidant proteins are central to cellular stress response network  
599 (Scandalios, 2002) and in corals there is clear evidence that antioxidant enzymes have a stress  
600 inducible role, driven by both environmental stress and pathogen elicitors (Mydlarz & Harvell,  
601 2007; Mydlarz et al., 2008; Palmer et al., 2011). Indeed, *M. capitata* exposed to thermal stress  
602 showed greater antioxidant activity but lower melanin when primed by a history of high pCO<sub>2</sub>-  
603 variability (Wall et al., 2018). The increasing role of catalase, peroxidase, and superoxide  
604 dismutase activity through time and in the second-bleaching event, compared to attenuated  
605 melanin-synthesis pathway (Figure 5, S1, S2), further demonstrates that specialized antioxidative  
606 enzymes are important for coping with chronic or persistent stress, as often reported in thermally  
607 stressed corals (Gardner et al., 2017; Lesser, 1997). Such constitutive upregulation of cellular  
608 defenses have also been observed in corals from areas of high thermal variance (Barshis et al.,  
609 2013) and those acclimatized to warmer conditions before the onset of bleaching stress  
610 (Bellantuono et al., 2012). In particular, the continued increases in superoxide dismutase and the

611 persistence of high levels of peroxidase in the final 2016-recovery period indicate that increasing  
612 constitutive levels of select antioxidants is key to maintaining cellular homeostasis after repeated  
613 or chronic thermal perturbations (Figure 5, S2). Such shifts in homeostatic mechanisms through  
614 strategies like gene plasticity (Kenkel & Matz, 2016) or constitutive frontloading (Barshis et al.,  
615 2013) reveal the important role of immunity, antioxidants, and their interplay in shaping  
616 ecological and evolutionary trajectories of reef corals and the future of coral reefs.

617 In conclusion, we show coral physiotypes were distinct during each period of bleaching and  
618 recovery from 2014-2016, and this indicates physiological legacy effects driven by chronic stress  
619 or beneficial acclimation influence both bleaching and recovery trajectories. Bleaching was  
620 strongly related to symbiont communities and their sensitivity to thermal stress, which was  
621 influenced by site environmental history. However, physiotypes were shaped by the cascade of  
622 immune and antioxidant activity in the bleaching and recovery periods irrespective of symbiont  
623 communities, providing a mechanistic hypothesis for the shifting coral physiotype baseline.  
624 Specifically, we observed changes in constitutive immunity from one year to the next in response  
625 to extreme stress events, indicating a fundamental change in the homeostatic mechanisms  
626 employed by corals. In an era of increasing frequency and magnitude of thermal stress, the  
627 ongoing study of mechanisms such as frontloading of genes like heat shock proteins and  
628 antioxidants to attenuate bleaching effects and support thermal resilience (Barshis et al., 2013) is  
629 of great importance. Additionally, the examination of acclimatization of populations to  
630 environmental stress that may be gained through gene expression plasticity (Kenkel & Matz,  
631 2016), or epigenetic mechanisms (Durante, Baums, Williams, Vohsen, & Kemp, 2019; Eirin-  
632 Lopez & Putnam, 2019; Liew et al., 2018) will be critical. Our study provides details of cellular  
633 and physiological legacy effects in corals and evidence that environmental memory shapes the

Wall et al., *submitted*

634 homeostatic strategies of corals, which ultimately dictates a coral's ability to respond to future  
635 stress events.

636

### 637 **Acknowledgements**

638 The authors acknowledge funding support from an Environmental Protection Agency STAR  
639 Fellowship Assistance Agreement (FP-91779401-1) to C.B.W and NSF 1756623 (Biological  
640 Oceanography, Integrative and Ecological Physiology, and EPSCoR) to H.M.P. The views  
641 expressed in this publication have not been reviewed or endorsed by the EPA and are solely  
642 those of the authors. We also thank P.J. Edmunds for insightful comments on an earlier  
643 manuscript draft. This is SOEST contribution number xxx and HIMB contribution number xxx.

644

### 645 **Author contributions**

646 C.B.W., C.A.R., L.D.M., R.D.G., and H.M.P. designed the project. C.B.W., C.A.R., L.D.M., and  
647 H.M.P. wrote the manuscript, and C.B.W. statistically analyzed the data. Coral collections were  
648 performed by C.B.W. and A.D.W. Laboratory analyses were performed by C.B.W., C.A.R.,  
649 A.D.W., B.E.L., and D.E.K.

650

### 651 **Competing interests**

652 The authors declare they have no competing interests.

653

### 654 **Data availability**

655 All data and code to generate figures and perform analyses are archived and openly available at  
656 Github (<https://github.com/cbwall/Gates-Mydlarz-bleaching-recovery/releases/tag/v4>).

657 **Tables**

658

**Table 1.** Results of PERMANOVA testing the effects of repeated bleaching and recovery periods on *Montipora capitata* corals hosting two distinct symbiont communities at two reef locations.

| <i>Factor</i>            | <i>df</i> | <i>SS</i> | <i>R</i> <sup>2</sup> | <i>F</i> | <i>p</i>         |
|--------------------------|-----------|-----------|-----------------------|----------|------------------|
| Period                   | 3         | 855.740   | 0.297                 | 48.491   | <b>&lt;0.001</b> |
| Site                     | 1         | 60.996    | 0.021                 | 10.369   | <b>&lt;0.001</b> |
| Symbiont                 | 1         | 202.349   | 0.070                 | 34.399   | <b>&lt;0.001</b> |
| Period × Site            | 3         | 69.003    | 0.024                 | 3.910    | <b>&lt;0.001</b> |
| Period × Symbiont        | 3         | 60.101    | 0.021                 | 3.406    | <b>&lt;0.001</b> |
| Site × Symbiont          | 1         | 6.861     | 0.002                 | 1.166    | 0.293            |
| Period × Site × Symbiont | 3         | 19.048    | 0.007                 | 1.079    | 0.360            |
| Residual                 | 273       | 1605.902  | 0.558                 |          |                  |
| Total                    | 288       | 2880.000  | 1.000                 |          |                  |

*Period* = sequential bleaching and recovery events from October 2014 – February 2016, *Site* = Lilipuna or Reef 14, *Symbiont* = *Cladocopium* sp. or *Durusdinium glynnii* dominated symbiont community. *SS* = sum of squares; *df* = degrees of freedom; bold *p* values represent significant effects ( $p < 0.05$ ).

659

660

661

662

663 **Figures**

664  
665  
666

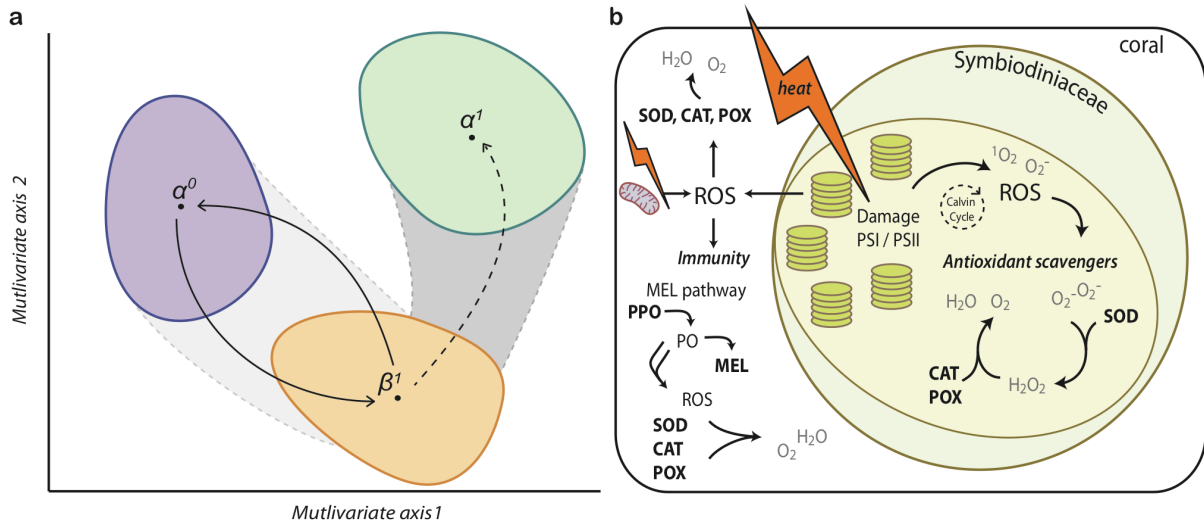

667  
668

669 **Figure 1.** (a) Multivariate analyses identify changes in organism physiotype through space and  
670 time by accounting for the variation in multiple traits (Van Straalen, 2003). Transitions of  
671 organisms from initial ( $\alpha^0$ ) to stressed states ( $\beta^1$ ), such as during bleaching in response to a heat  
672 wave, and their recovery to initial ( $\alpha^0$ ) (i.e., physiological resilience) or altered states ( $\alpha^1$ ).  
673 Alternatively the absence of physiotype shifts may be observed in stress resistant individuals  
674 (i.e., maintained at  $\alpha^0$ ). (b) Conceptual model of melanin and antioxidant activity in coral and  
675 Symbiodiniaceae under heat stress (indicated by lightning bolts). Reactive oxygen species  
676 (ROS), oxygen singlets ( $^1O_2$ ) and superoxide ( $O_2^-$ ), generated by symbiont photochemical  
677 dysfunction and host mitochondria membrane damage, are neutralized by a combination of  
678 antioxidant scavenger enzymes (e.g., superoxide dismutase [SOD], catalase [CAT], and  
679 peroxidase [POX]). Host immunity via the melanin-synthesis pathway can also scavenge ROS  
680 during intermediate steps that lead to the synthesis of melanin (MEL). Oxidative bursts during  
681 the melanin-synthesis pathway can also create ROS that act as antimicrobials, which may also  
682 lead to priming, or antioxidant enzymes up-regulation (shown in bold letters and dark lines).

683  
684  
685  
686  
687  
688  
689  
690  
691  
692  
693  
694  
695

696  
697  
698  
699  
700  
701  
702  
703  
704  
705  
706  
707  
708  
709  
710  
711  
712  
713  
714  
715  
716  
717  
718  
719  
720  
721  
722  
723  
724  
725  
726  
727  
728  
729  
730  
731  
732  
733  
734  
735  
736  
737  
738  
739  
740  
741

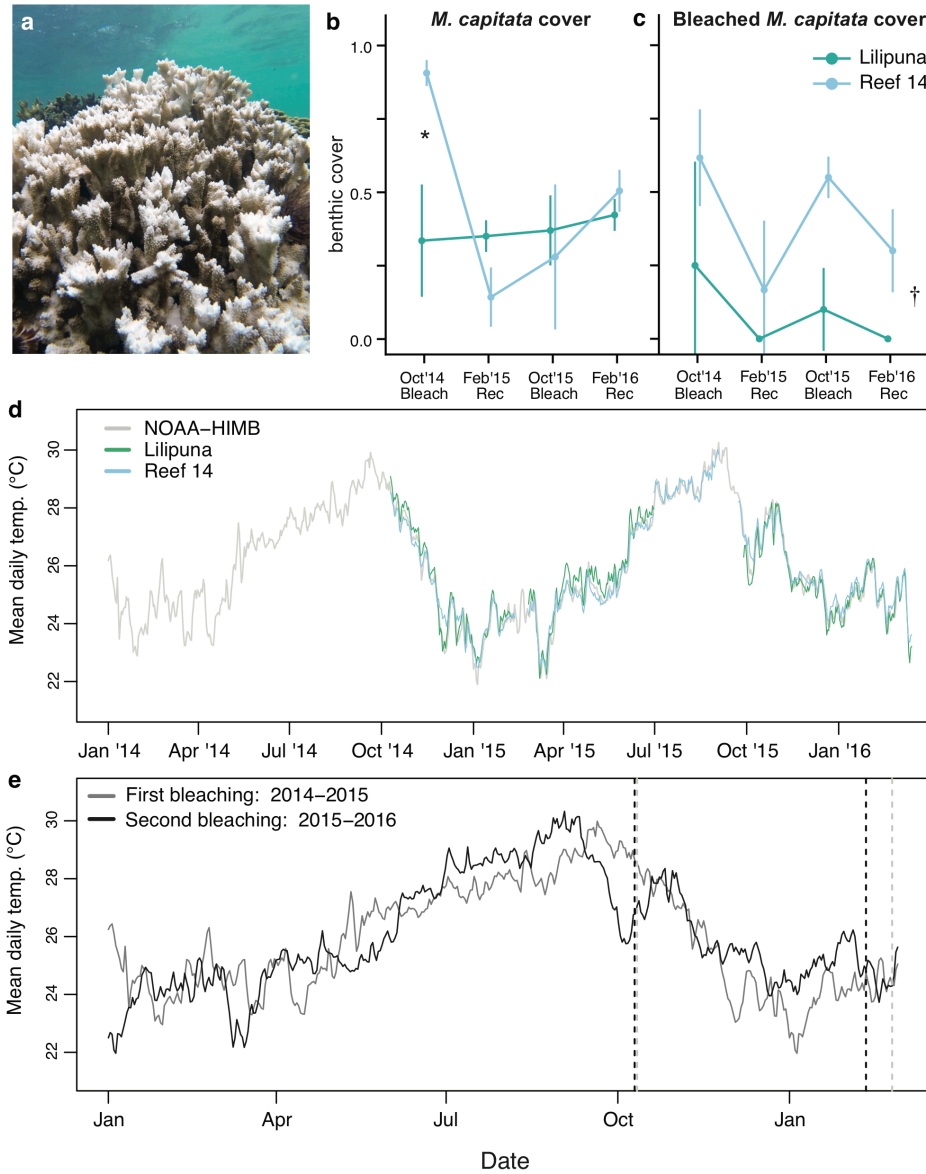

**Figure 2.** *Montipora capitata* cover and bleaching patterns at two reefs in relation to thermal regimes. (a) A bleached *M. capitata* colony and (b) benthic surveys of absolute *M. capitata* at two sites (Lilipuna and Reef 14) during and after thermal stress in 2014-2015 and 2015-2016. (c) The proportion of bleached *M. capitata* colonies scored during (October) and after (February) thermal stress (values are mean  $\pm$  SD,  $n$  = duplicate transects). Symbols indicate differences among sites within a period (\*) and among sites ( $\dagger$ ). (d) Overlay of mean daily temperatures at Lilipuna and Reef 14 and the NOAA-HIMB Moku o Lo'e buoy from January 2014 - January 2016 and (e) a comparison of temperature ramping and cooling between the first and second bleaching events relative to our collection dates. Vertical dashed lines indicate coral collections during bleaching and recovery periods in the first (black, 2014-2015) and second (gray, 2015-2016) events.



742  
743  
744  
745  
746  
747  
748  
749  
750  
751  
752  
753  
754  
755  
756  
757  
758  
759  
760  
761  
762  
763  
764  
765  
766  
767  
768  
769  
770  
771  
772  
773  
774  
775  
776  
777

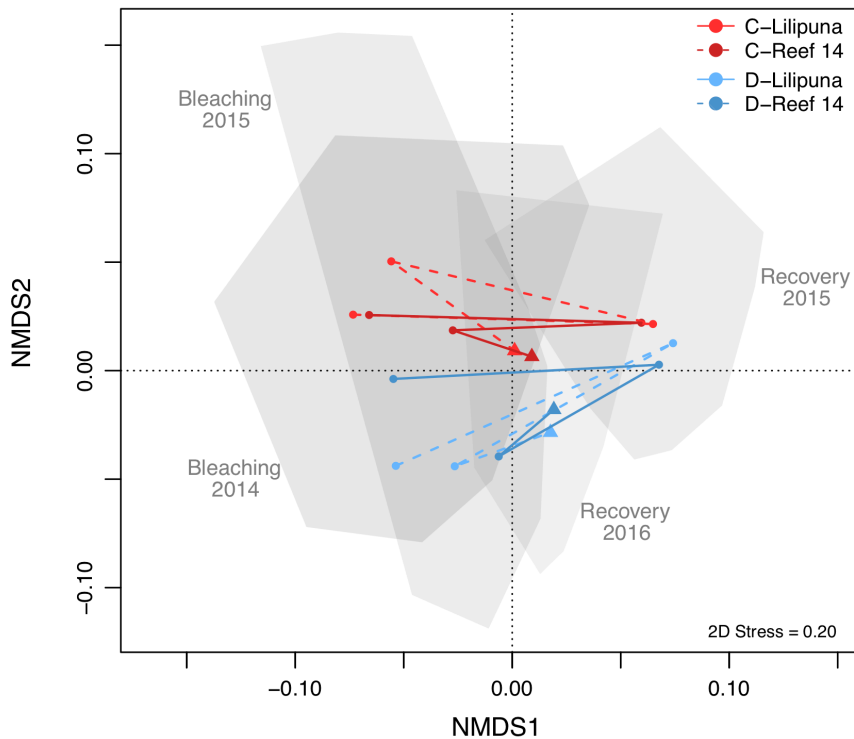

**Figure 3.** Non-metric multidimensional scaling (NMDS) analyses of coral performance envelopes during bleaching stress and post-bleaching recovery. *Montipora capitata* corals dominated by *Cladocopium* sp. (red) or *Durusdinium glynnii* (blue) symbionts from two sites (solid lines Lilipuna, dashed lines Reef 14). Convex hulls represent the coral physiotype (i.e., NMDS point clusters) of all corals in each time period, with points indicating mean centroids of physiotype polygon for each group. Lines show trajectories of mean centroids for each group across the four periods (Bleaching 2014, Recovery 2015, Bleaching 2015, Recovery 2016) and triangle arrowheads indicate trajectory termini.

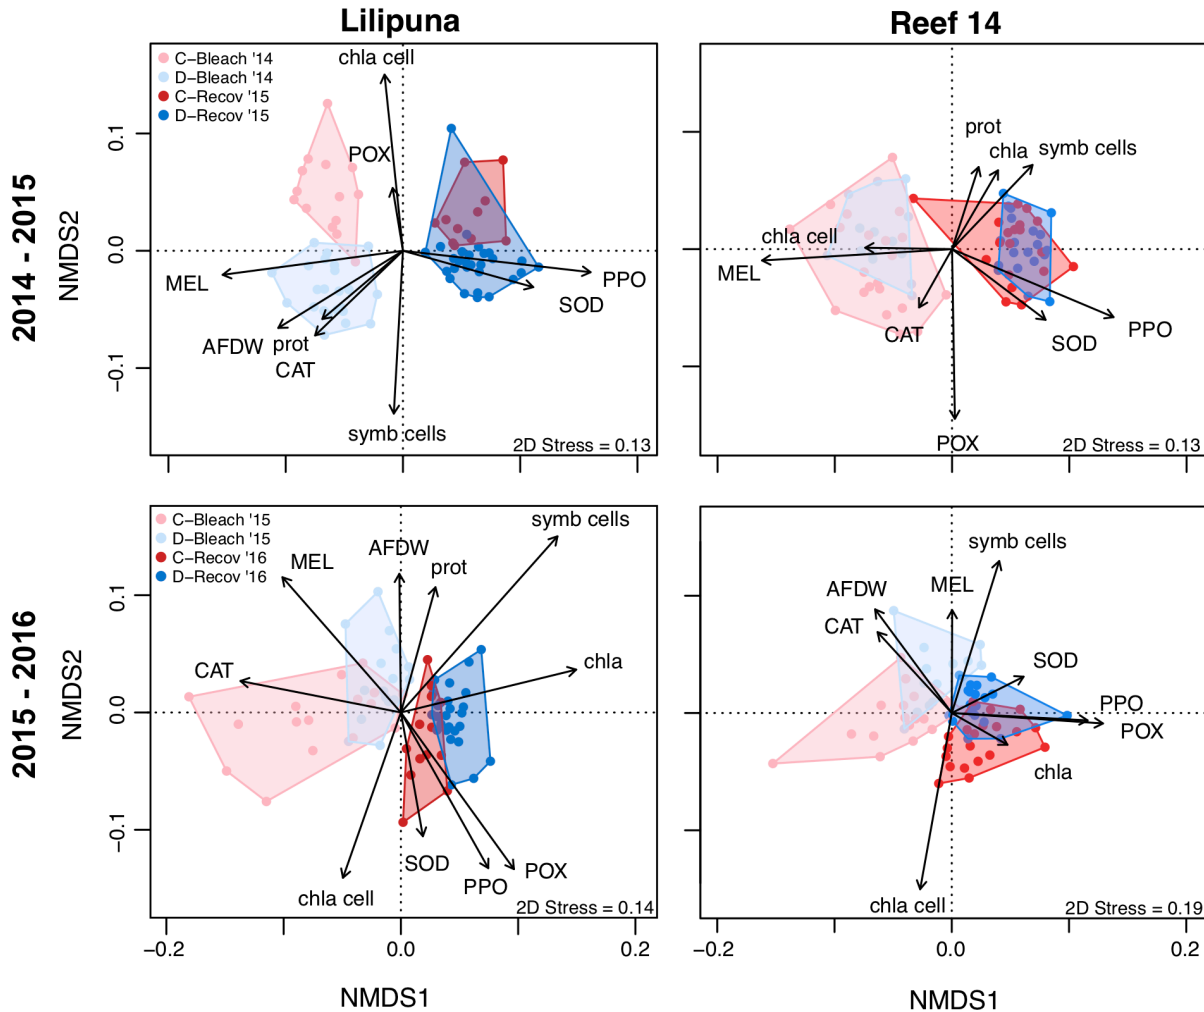

778  
779  
780  
781  
782  
783  
784  
785  
786  
787  
788  
789  
790  
791

**Figure 4.** Non-metric multidimensional scaling (NMDS) analyses identify coral physiotypes separated by dominant symbiont type (colors), bleaching-recovery periods (lighter and darker shades), sites (columns), and events (rows). *Montipora capitata* corals dominated by *Cladocopium* sp. or *Durusdinium glynnii* symbionts from Lilipuna (left panel) and Reef 14 (right panel) during bleaching (Bleach) and recovery (Recov) periods. Biplot vectors (black arrows) represent significant physiology and immunity responses ( $p < 0.05$ ) according to squared correlation coefficients ( $r^2$ ). AFDW = ash-free dry weight biomass ( $\text{mg gdw}^{-1}$ ), CAT = catalase, MEL = melanin, POX = peroxidase, PPO = prophenoxidase, SOD = superoxide dismutase, chla = chlorophyll  $a \mu\text{g cm}^{-2}$ , chla cell = chlorophyll  $a$  per symbiont cell, prot = protein  $\text{mg cm}^{-2}$ , symb cells = symbionts  $\text{cm}^{-2}$ .

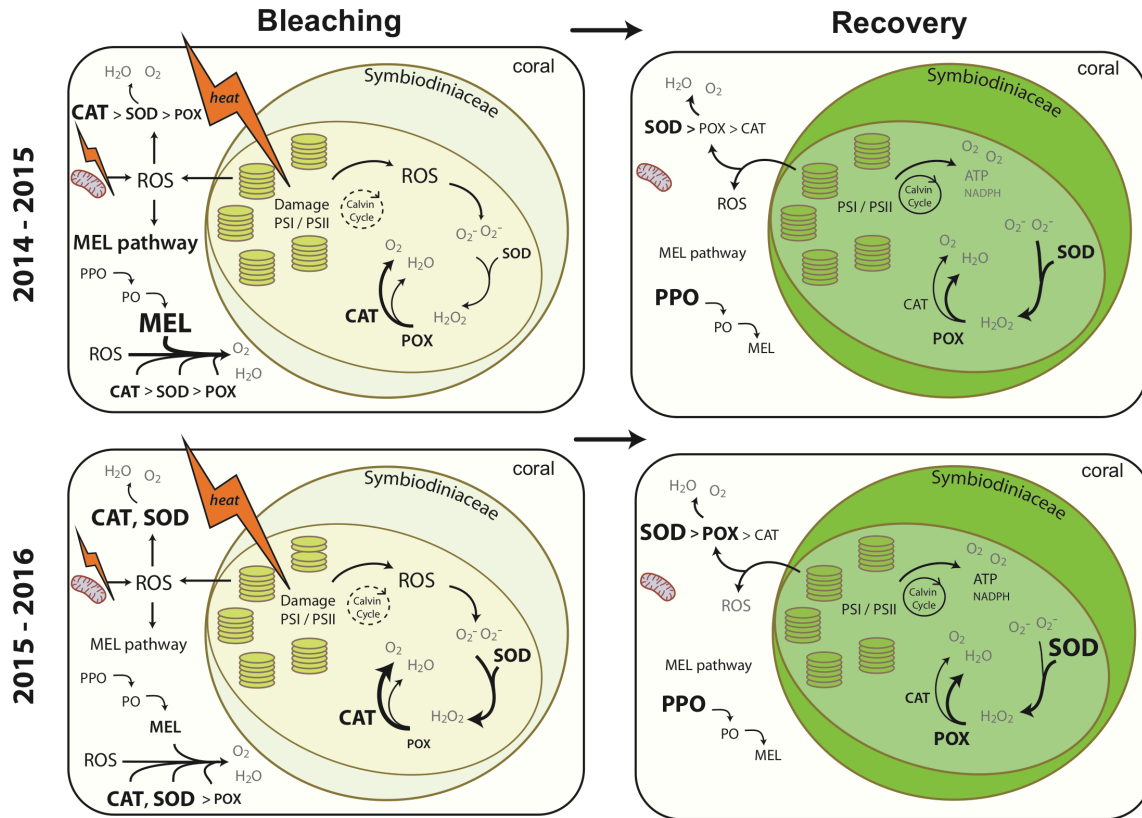

792  
793  
794  
795  
796  
797  
798  
799  
800  
801  
802

**Figure 5.** Schematic of mechanistic coral responses to repeat bleaching and recovery leading to shifted phenotypes. In the first event (*top row*) thermal stress leads to a substantial increase in MEL along with modest spikes in CAT and SOD. Corals in the first recovery showed increases in PPO (as the precursor to the melanin-pathway) as well as SOD and POX, while CAT activity declined. In the second event (*bottom row*), CAT and SOD spike with modest contributions of MEL and a general decline in POX. Corals in the second recovery had the highest levels of SOD across all time points, an increase in POX and a sharp decline in CAT (*see Figure 4 for abbreviations*).

803

804 **References**

- 805 Ainsworth, T. D., Heron, S. F., Ortiz, J. C., Mumby, P. J., Grech, A., Ogawa, D., ... Leggat, W.  
806 (2016). Climate change disables coral bleaching protection on the Great Barrier Reef.  
807 *Science*, 352(6283), 338–342. doi: 10.1126/science.aac7125
- 808 Bahr, K. D., Rodgers, K. S., & Jokiel, P. L. (2017). Impact of Three Bleaching Events on the  
809 Reef Resiliency of Kāneʻohe Bay, Hawaiʻi. *Frontiers in Marine Science*, 4, 435. doi:  
810 10.3389/fmars.2017.00398
- 811 Baker, A. C. (2003). Flexibility and Specificity in Coral-Algal Symbiosis: Diversity, Ecology,  
812 and Biogeography of *Symbiodinium*. *Annual Review of Ecology, Evolution, and*  
813 *Systematics*, 34, 661–689.
- 814 Barshis, D. J., Ladner, J. T., Oliver, T. A., Seneca, F. O., Traylor-Knowles, N., & Palumbi, S. R.  
815 (2013). Genomic basis for coral resilience to climate change. *Proceedings of the National*  
816 *Academy of Sciences of the United States of America*, 110(4), 1387–1392. doi:  
817 10.1073/pnas.1210224110
- 818 Bellantuono, A. J., Granados-Cifuentes, C., Miller, D. J., Hoegh-Guldberg, O., & Rodriguez-  
819 Lanetty, M. (2012). Coral Thermal Tolerance: Tuning Gene Expression to Resist Thermal  
820 Stress. *PloS One*, 7(11), e50685–14. doi: 10.1371/journal.pone.0050685
- 821 Box, G. E. P., & Cox, D. R. (1964). An Analysis of Transformations. *Journal of the Royal*  
822 *Statistical Society. Series B, Statistical Methodology*, 26(2), 211–243. doi: 10.1111/j.2517-  
823 6161.1964.tb00553.x
- 824 Brown, B. E., Dunne, R. P., Edwards, A. J., Sweet, M. J., & Phongsuwan, N. (2015). Decadal  
825 environmental “memory” in a reef coral? *Marine Biology*, 162(2), 479–483.  
826 <http://link.springer.com/10.1007/s00227-014-2596-2>

Wall et al., *submitted*

- 827 Brown, B. E., Dunne, R. P., Goodson, M. S., & Douglas, A. E. (2000). Bleaching patterns in reef  
828 corals. *Nature*, *404*(6774), 142–143. doi: 10.1038/35004657
- 829 Buddemeier, R. W., & Fautin, D. G. (1993). Coral bleaching as an adaptive mechanism.  
830 *Bioscience*, *43*(5), 320–326.
- 831 Couch, C. S., Burns, J. H. R., Liu, G., Steward, K., Gutlay, T. N., Kenyon, J., ... Kosaki, R. K.  
832 (2017). Mass coral bleaching due to unprecedented marine heatwave in  
833 Papahānaumokuākea Marine National Monument (Northwestern Hawaiian Islands). *PLoS*  
834 *One*, *12*(9), e0185121. doi: 10.1371/journal.pone.0185121
- 835 Cunning, R., & Baker, A. C. (2013). Excess algal symbionts increase the susceptibility of reef  
836 corals to bleaching. *Nature Climate Change*, *3*, 259–262. doi: 10.1038/nclimate1711
- 837 Cunning, R., Ritson-Williams, R., & Gates, R. D. (2016). Patterns of bleaching and recovery of  
838 *Montipora capitata* in Kāne ‘ohe Bay, Hawai ‘i, USA. *Marine Ecology Progress Series*,  
839 *551*, 131–139. <http://www.int-res.com/abstracts/meps/v551/p131-139/>
- 840 De’ath, G., Fabricius, K. E., Sweatman, H., & Puotinen, M. (2012). The 27-year decline of coral  
841 cover on the Great Barrier Reef and its causes. *Proceedings of the National Academy of*  
842 *Sciences of the United States of America*, *109*(44), 17995–17999. doi:  
843 10.1073/pnas.1208909109
- 844 Drupp, P. S., De Carlo, E. H., Mackenzie, F. T., Sabine, C. L., Feely, R. A., & Shamberger, K. E.  
845 (2013). Comparison of CO<sub>2</sub> Dynamics and Air–Sea Gas Exchange in Differing Tropical  
846 Reef Environments. *Aquatic Geochemistry*, *19*(5-6), 371–397. doi: 10.1007/s10498-013-  
847 9214-7
- 848 Drupp, P., De Carlo, E. H., Mackenzie, F. T., Bienfang, P., & Sabine, C. L. (2011). Nutrient  
849 Inputs, Phytoplankton Response, and CO<sub>2</sub> Variations in a Semi-Enclosed Subtropical

- 850        Embayment, Kaneohe Bay, Hawaii. *Aquatic Geochemistry*, 17(4), 473–498. doi:  
851        10.1007/s10498-010-9115-y
- 852        Dunn, S. R., Pernice, M., Green, K., Hoegh-Guldberg, O., & Dove, S. G. (2012). Thermal stress  
853        promotes host mitochondrial degradation in symbiotic cnidarians: are the batteries of the  
854        reef going to run out? *PloS One*, 7(7), e39024. doi: 10.1371/journal.pone.0039024
- 855        Durante, M. K., Baums, I. B., Williams, D. E., Vohsen, S., & Kemp, D. W. (2019). What drives  
856        phenotypic divergence among coral clonemates of *Acropora palmata*? *Molecular Ecology*,  
857        28(13), 3208–3224. doi: 10.1111/mec.15140
- 858        Edmunds, P. J., Adjeroud, M., Baskett, M. L., Baums, I. B., Budd, A. F., Carpenter, R. C., ...  
859        Gates, R. D. (2014). Persistence and Change in Community Composition of Reef Corals  
860        through Present, Past, and Future Climates. *PloS One*, 9(10), e107525.  
861        <http://dx.plos.org/10.1371/journal.pone.0107525.s001>
- 862        Edmunds, P. J., Pochon, X., Levitan, D. R., Yost, D. M., Belcaid, M., Putnam, H. M., & Gates,  
863        R. D. (2014). Long-term changes in *Symbiodinium* communities in *Orbicella annularis* in  
864        St. John, US Virgin Islands. *Marine Ecology Progress Series*, 506, 129–144. doi:  
865        10.3354/meps10808
- 866        Eirin-Lopez, J. M., & Putnam, H. M. (2019). Marine Environmental Epigenetics. *Annual Review*  
867        *of Marine Science*, 11, 335–368. doi: 10.1146/annurev-marine-010318-095114
- 868        Fitt, W. K., McFarland, F. K., Warner, M. E., & Chilcoat, G. C. (2000). Seasonal patterns of  
869        tissue biomass and densities of symbiotic dinoflagellates in reef corals and relation to coral  
870        bleaching. *Limnology and Oceanography*, 45(3), 677–685. doi: 10.4319/lo.2000.45.3.0677
- 871        Fuess, L. E., Mann, W. T., Jinks, L. R., Brinkhuis, V., & Mydlarz, L. D. (2018). Transcriptional  
872        analyses provide new insight into the late-stage immune response of a diseased Caribbean

- 873 coral. *Royal Society Open Science*, 5(5), 172062. doi: 10.1098/rsos.172062
- 874 Gardner, S. G., Raina, J.-B., Nitschke, M. R., Nielsen, D. A., Stat, M., Motti, C. A., ... Petrou,  
875 K. (2017). A multi-trait systems approach reveals a response cascade to bleaching in corals.  
876 *BMC Biology*, 15(1), 117. doi: 10.1186/s12915-017-0459-2
- 877 Hawkins, T. D., Krueger, T., Becker, S., Fisher, P. L., & Davy, S. K. (2014). Differential nitric  
878 oxide synthesis and host apoptotic events correlate with bleaching susceptibility in reef  
879 corals. *Coral Reefs*, 33(1), 141–153. doi: [10.1007/s00338-013-1103-4](https://doi.org/10.1007/s00338-013-1103-4)
- 880 Hughes, T. P., Anderson, K. D., Connolly, S. R., Heron, S. F., Kerry, J. T., Lough, J. M., ...  
881 Wilson, S. K. (2018a). Spatial and temporal patterns of mass bleaching of corals in the  
882 Anthropocene. *Science*, 359(6371), 80–83. doi: 10.1126/science.aan8048
- 883 Hughes, T. P., Kerry, J. T., Álvarez-Noriega, M., Álvarez-Romero, J. G., Anderson, K. D.,  
884 Baird, A. H., ... Wilson, S. K. (2017). Global warming and recurrent mass bleaching of  
885 corals. *Nature*, 543(7645), 373–377. doi: 10.1038/nature21707
- 886 Hughes, T. P., Kerry, J. T., Baird, A. H., Connolly, S. R., Chase, T. J., Dietzel, A., ... Woods, R.  
887 M. (2019). Global warming impairs stock–recruitment dynamics of corals. *Nature*,  
888 568(7752), 387–390. doi: 10.1038/s41586-019-1081-y
- 889 Hughes, T. P., Kerry, J. T., Baird, A. H., Connolly, S. R., Dietzel, A., Eakin, C. M., ... Torda, G.  
890 (2018b). Global warming transforms coral reef assemblages. *Nature*, 556(7702), 492–496.  
891 doi: 10.1038/s41586-018-0041-2
- 892 Innis, T., Cunning, R., Ritson-Williams, R., Wall, C. B., & Gates, R. D. (2018). Coral color and  
893 depth drive symbiosis ecology of *Montipora capitata* in Kāneʻohe Bay, Oʻahu, Hawaiʻi.  
894 *Coral Reefs*, 37(2), 423–430. doi: 10.1007/s00338-018-1667-0
- 895 Jeffrey, S. W., & Humphrey, G. F. (1975). New spectrophotometric equations for determining

Wall et al., *submitted*

- 896 chlorophylls a, b, c1 and c2 in higher plants, algae and natural phytoplankton. *Biochemie*  
897 *Und Physiologie Der Pflanzen: BPP*, 167(2), 191–194. doi: 10.1016/S0015-  
898 3796(17)30778-3
- 899 Jokieli, P. L., & Brown, E. K. (2004). Global warming, regional trends and inshore environmental  
900 conditions influence coral bleaching in Hawaii. *Global Change Biology*, 10(10), 1627–  
901 1641. doi: 10.1111/j.1365-2486.2004.00836.x
- 902 Jones, R. J., Hoegh-Guldberg, O., Larkum, A. W. D., & Schreiber, U. (1998). Temperature-  
903 induced bleaching of corals begins with impairment of the CO<sub>2</sub> fixation mechanism in  
904 zooxanthellae. *Plant, Cell & Environment*, 21(12), 1219–1230.
- 905 Kenkel, C. D., & Matz, M. V. (2016). Gene expression plasticity as a mechanism of coral  
906 adaptation to a variable environment. *Nature Ecology & Evolution*, 1(1), 14. doi:  
907 10.1038/s41559-016-0014
- 908 Krueger, T., Fisher, P. L., Becker, S., Pontasch, S., Dove, S., Hoegh-Guldberg, O., ... Davy, S.  
909 K. (2015). Transcriptomic characterization of the enzymatic antioxidants FeSOD, MnSOD,  
910 APX and KatG in the dinoflagellate genus *Symbiodinium*. *BMC Evolutionary Biology*, 15,  
911 48. doi: 10.1186/s12862-015-0326-0
- 912 Krueger, T., Hawkins, T. D., Becker, S., Pontasch, S., Dove, S., Hoegh-Guldberg, O., ... Davy,  
913 S. K. (2015). Differential coral bleaching—Contrasting the activity and response of  
914 enzymatic antioxidants in symbiotic partners under thermal stress. *Comparative*  
915 *Biochemistry and Physiology, Part A*, 190(C), 15–25. doi: 10.1016/j.cbpa.2015.08.012
- 916 Lenth, R. V. (2019). Russell Lenth (2019). emmeans: Estimated Marginal Means, aka Least-  
917 Squares Means. R package version 1.3.5. <https://CRAN.R-project.org/package=emmeans>.  
918 *Journal of Statistical Software*, 69(1), 1–33. <https://CRAN.R->



Wall et al., *submitted*

- 919        project.org/package=emmeans
- 920 Lesser, M. P. (1997). Oxidative stress causes coral bleaching during exposure to elevated  
921        temperatures. *Coral Reefs* , 16(3), 187–192. doi: 10.1007/s003380050073
- 922 Lesser, M. P., Stat, M., & Gates, R. D. (2013). The endosymbiotic dinoflagellates (*Symbiodinium*  
923        sp.) of corals are parasites and mutualists. *Coral Reefs* , 32(3), 603–611. doi:  
924        10.1007/s00338-013-1051-z
- 925 Liew, Y. J., Zoccola, D., Li, Y., Tambutté, E., Venn, A. A., Michell, C. T., ... Aranda, M.  
926        (2018). Epigenome-associated phenotypic acclimatization to ocean acidification in a reef-  
927        building coral. *Science Advances*, 4(6), eaar8028. doi: 10.1126/sciadv.aar8028
- 928 Lowe, R. J., Falter, J. L., Monismith, S. G., & Atkinson, M. J. (2009). A numerical study of  
929        circulation in a coastal reef-lagoon system. *Journal of Geophysical Research*, 114(C6), 997.  
930        doi: 10.1029/2008JC005081
- 931 McClanahan, T. R., Ateweberhan, M., & Omukoto, J. (2007). Long-term changes in coral colony  
932        size distributions on Kenyan reefs under different management regimes and across the 1998  
933        bleaching event. *Marine Biology*, 153(5), 755–768. doi: [10.1007/s00227-007-0844-4](https://doi.org/10.1007/s00227-007-0844-4)
- 934 McWilliam, M., Pratchett, M. S., Hoogenboom, M. O., & Hughes, T. P. (2020). Deficits in  
935        functional trait diversity following recovery on coral reefs. *Proceedings. Biological*  
936        *Sciences / The Royal Society*, 287(1918), 20192628. doi: 10.1098/rspb.2019.2628
- 937 Murphy, J. W. A., Collier, A. C., & Richmond, R. H. (2019). Antioxidant enzyme cycling over  
938        reproductive lunar cycles in *Pocillopora damicornis*. *PeerJ*, 7, e7020. doi:  
939        10.7717/peerj.7020
- 940 Mydlarz, L. D., & Harvell, C. D. (2007). Peroxidase activity and inducibility in the sea fan coral  
941        exposed to a fungal pathogen. *Comparative Biochemistry and Physiology. Part A*,

Wall et al., *submitted*

- 942        *Molecular & Integrative Physiology*, 146(1), 54–62. doi: 10.1016/j.cbpa.2006.09.005
- 943 Mydlarz, L. D., & Palmer, C. V. (2011). The presence of multiple phenoloxidases in Caribbean  
944 reef-building corals. *Comparative Biochemistry and Physiology. Part A, Molecular &*  
945 *Integrative Physiology*, 159(4), 372–378. doi: 10.1016/j.cbpa.2011.03.029
- 946 Mydlarz, L. D., Couch, C. S., Weil, E., Smith, G., & Harvell, C. D. (2009). Immune defenses of  
947 healthy, bleached and diseased *Montastraea faveolata* during a natural bleaching event.  
948 *Diseases of Aquatic Organisms*, 87(1-2), 67–78. doi: 10.3354/dao02088
- 949 Mydlarz, L. D., Holthouse, S. F., Peters, E. C., & Harvell, C. D. (2008). Cellular Responses in  
950 Sea Fan Corals: Granular Amoebocytes React to Pathogen and Climate Stressors. *PloS One*,  
951 3(3), e1811–e1819. doi: 10.1371/journal.pone.0001811
- 952 Mydlarz, L. D., McGinty, E. S., & Harvell, C. D. (2010). What are the physiological and  
953 immunological responses of coral to climate warming and disease? *The Journal of*  
954 *Experimental Biology*, 213(6), 934–945. doi: 10.1242/jeb.037580
- 955 NOAA. (2019, August 14). Retrieved August 14, 2019, from National Data Buoy Center, Station  
956 MOKH1 - 1612480 - Mokuoloe, HI website:  
957 [https://www.ndbc.noaa.gov/station\\_page.php?station=mokh1](https://www.ndbc.noaa.gov/station_page.php?station=mokh1)
- 958 NOAA. (2020, April 20). Coral Reef Watch, NOAA Satellite and Information Services,  
959 <https://coralreefwatch.noaa.gov/satellite/methodology/methodology.php>
- 960 Oksanen, J., Guillaume, F. B., Friendly, M., Kindt, R., Legendre, P., McGlinn, D., ... Wagner,  
961 H. (2019). *vegan: Community Ecology Package*. 631–637. [https://cran.r-](https://cran.r-project.org/web/packages/vegan/index.html)  
962 [project.org/web/packages/vegan/index.html](https://cran.r-project.org/web/packages/vegan/index.html)
- 963 Palmer, C. V. (2018a). Immunity and the coral crisis. *Communications Biology*, 1, 91. doi:  
964 10.1038/s42003-018-0097-4

- 965 Palmer, C. V. (2018b). Warmer Water Affects Immunity of a Tolerant Reef Coral. *Frontiers in*  
966 *Marine Science*, 5, 253. doi: 10.3389/fmars.2018.00253
- 967 Palmer, C. V., & Traylor-Knowles, N. (2012). Towards an integrated network of coral immune  
968 mechanisms. *Proceedings. Biological Sciences / The Royal Society*, 279(1745), 4106–4114.  
969 doi: 10.1098/rspb.2012.1477
- 970 Palmer, C. V., Bythell, J. C., & Willis, B. L. (2010). Levels of immunity parameters underpin  
971 bleaching and disease susceptibility of reef corals. *FASEB Journal: Official Publication of*  
972 *the Federation of American Societies for Experimental Biology*, 24(6), 1935–1946. doi:  
973 10.1096/fj.09-152447
- 974 Palmer, C. V., McGinty, E. S., Cummings, D. J., Smith, S. M., Bartels, E., & Mydlarz, L. D.  
975 (2011). Patterns of coral ecological immunology: variation in the responses of Caribbean  
976 corals to elevated temperature and a pathogen elicitor. *The Journal of Experimental*  
977 *Biology*, 214(Pt 24), 4240–4249. doi: 10.1242/jeb.061267
- 978 Palmer, C. V., Traylor-Knowles, N. G., Willis, B. L., & Bythell, J. C. (2011). Corals Use Similar  
979 Immune Cells and Wound-Healing Processes as Those of Higher Organisms. *PloS One*,  
980 6(8), e23992–11. doi: 10.1371/journal.pone.0023992
- 981 Palumbi, S. R., Barshis, D. J., Traylor-Knowles, N., & Bay, R. A. (2014). Mechanisms of reef  
982 coral resistance to future climate change. *Science*, 344(6186), 895–898. doi:  
983 10.1126/science.1251336
- 984 Pinzón C, J. H., Beach-Letendre, J., Weil, E., & Mydlarz, L. D. (2014). Relationship between  
985 Phylogeny and Immunity Suggests Older Caribbean Coral Lineages Are More Resistant to  
986 Disease. *PloS One*, 9(8), e104787. doi: 10.1371/journal.pone.0104787
- 987 Pinzón, J. H., Kamel, B., Burge, C. A., Harvell, C. D., Medina, M., Weil, E., & Mydlarz, L. D.

Wall et al., *submitted*

- 988 (2015). Whole transcriptome analysis reveals changes in expression of immune-related  
989 genes during and after bleaching in a reef-building coral. *Royal Society Open Science*, 2(4),  
990 140214. doi: 10.1098/rsos.140214
- 991 R Core Team. (2020). *R: A language and environment for statistical computing*. [https://www.R-](https://www.R-project.org)  
992 [project.org](https://www.R-project.org)
- 993 Richier, S., Sabourault, C., Courtiade, J., Zucchini, N., Allemand, D., & Furla, P. (2006).  
994 Oxidative stress and apoptotic events during thermal stress in the symbiotic sea anemone,  
995 *Anemonia viridis*. *The FEBS Journal*, 273(18), 4186–4198. doi: 10.1111/j.1742-  
996 4658.2006.05414.x
- 997 Ritson-Williams, R., & Gates, R. D. (2020). Coral community resilience to successive years of  
998 bleaching in Kāne‘ohe Bay, Hawai‘i. *Coral Reefs* . doi: 10.1007/s00338-020-01944-4
- 999 Robinson, J. P. W., Wilson, S. K., Jennings, S., & Graham, N. A. J. (2019). Thermal stress  
1000 induces persistently altered coral reef fish assemblages. *Global Change Biology*, 25(8),  
1001 2739–2750. doi: 10.1111/gcb.14704
- 1002 Safaie, A., Silbiger, N. J., McClanahan, T. R., Pawlak, G., Barshis, D. J., Hench, J. L., ... Davis,  
1003 K. A. (2018). High frequency temperature variability reduces the risk of coral bleaching.  
1004 *Nature Communications*, 9(1), 1671. doi: 10.1038/s41467-018-04074-2
- 1005 Sale, T. L., Marko, P. B., Oliver, T. A., & Hunter, C. L. (2019). Assessment of acclimatization  
1006 and subsequent survival of corals during repeated natural thermal stress events in Hawai‘i.  
1007 *Marine Ecology Progress Series*, 624, 65–76. doi: 10.3354/meps13031
- 1008 Sampayo, E. M., Ridgway, T., Bongaerts, P., & Hoegh-Guldberg, O. (2008). Bleaching  
1009 susceptibility and mortality of corals are determined by fine-scale differences in symbiont  
1010 type. *Proceedings of the National Academy of Sciences of the United States of America*,

Wall et al., *submitted*

- 1011 *105*(30), 10444–10449. doi: 10.1073/pnas.0708049105
- 1012 Scandalios, J. G. (2002). Oxidative stress responses--what have genome-scale studies taught us?
- 1013 *Genome Biology*, 3(7), REVIEWS1019. doi: 10.1186/gb-2002-3-7-reviews1019
- 1014 Schoepf, V., Grottoli, A. G., Levas, S. J., Aschaffenburg, M. D., Baumann, J. H., Matsui, Y., &
- 1015 Warner, M. E. (2015). Annual coral bleaching and the long-term recovery capacity of coral.
- 1016 *Proceedings. Biological Sciences / The Royal Society*, 282(1819), 20151887. doi:
- 1017 10.1098/rspb.2015.1887
- 1018 Silverstein, R. N., Cunning, R., & Baker, A. C. (2017). Tenacious D: *Symbiodinium* in clade D
- 1019 remain in reef corals at both high and low temperature extremes despite impairment. *The*
- 1020 *Journal of Experimental Biology*, 220(Pt 7), 1192–1196. doi: 10.1242/jeb.148239
- 1021 Stat, M., Morris, E., & Gates, R. D. (2008). Functional diversity in coral–dinoflagellate
- 1022 symbiosis. *Proceedings of the National Academy of Sciences of the United States of*
- 1023 *America*, 105(27), 9256–9261.
- 1024 Stimson, J., & Kinzie, R. A. (1991). The temporal pattern and rate of release of zooxanthellae
- 1025 from the reef coral *Pocillopora damicornis* (Linnaeus) under nitrogen-enrichment and
- 1026 control conditions. *Journal of Experimental Marine Biology and Ecology*, 153(1), 63–74.
- 1027 doi: 10.1016/S0022-0981(05)80006-1
- 1028 Stuart-Smith, R. D., Brown, C. J., Ceccarelli, D. M., & Edgar, G. J. (2018). Ecosystem
- 1029 restructuring along the Great Barrier Reef following mass coral bleaching. *Nature*,
- 1030 560(7716), 92–96. doi: 10.1038/s41586-018-0359-9
- 1031 Suggett, D. J., & Smith, D. J. (2019). Coral bleaching patterns are the outcome of complex
- 1032 biological and environmental networking. *Global Change Biology*. doi: 10.1111/gcb.14871
- 1033 Suggett, D. J., Warner, M. E., & Leggat, W. (2017). Symbiotic Dinoflagellate Functional

Wall et al., *submitted*

- 1034 Diversity Mediates Coral Survival under Ecological Crisis. *Trends in Ecology & Evolution*,  
1035 1–11. doi: 10.1016/j.tree.2017.07.013
- 1036 Thornhill, D. J., Rotjan, R. D., Todd, B. D., Chilcoat, G. C., Iglesias-Prieto, R., Kemp, D. W., ...  
1037 Fitt, W. K. (2011). A Connection between Colony Biomass and Death in Caribbean Reef-  
1038 Building Corals. *PloS One*, 6(12), e29535. doi: 10.1371/journal.pone.0029535
- 1039 van Hooijdonk, R., Maynard, J. A., & Planes, S. (2013). Temporary refugia for coral reefs in a  
1040 warming world. *Nature Climate Change*, 3(5), 508–511. doi: 10.1038/nclimate1829
- 1041 Van Straalen, N. M. (2003). Ecotoxicology becomes stress ecology. *Environmental Science &*  
1042 *Technology*, 37(17), 324A – 330A. doi: 10.1021/es0325720
- 1043 Venable, W. N., & Ripley, B. D. (2002). Modern Applied Statistics with S. Springer. *New York*.
- 1044 Venn, A. A., Loram, J. E., & Douglas, A. E. (2008). Photosynthetic symbioses in animals.  
1045 *Journal of Experimental Botany*, 59(5), 1069–1080.
- 1046 Vercelloni, J., Liqueur, B., Kennedy, E. V., González-Rivero, M., Caley, M. J., Peterson, E. E., ...  
1047 Mengersen, K. (2020). Forecasting intensifying disturbance effects on coral reefs. *Global*  
1048 *Change Biology*. doi: 10.1111/gcb.15059
- 1049 Vidal-Dupirol, J., Zoccola, D., Tambutté, E., Grunau, C., Cosseau, C., Smith, K. M., ...  
1050 Tambutté, S. (2013). Genes related to ion-transport and energy production are upregulated  
1051 in response to CO<sub>2</sub>-driven pH decrease in corals: new insights from transcriptome analysis.  
1052 *PloS One*, 8(3), e58652. doi: 10.1371/journal.pone.0058652
- 1053 Wall, C. B., Kaluhiokalani, M., Popp, B. N., Donahue, M. J., & Gates, R. D. (2020). Divergent  
1054 symbiont communities determine the physiology and nutrition of a reef coral across a light-  
1055 availability gradient. *The ISME Journal*. doi: 10.1038/s41396-019-0570-1
- 1056 Wall, C. B., Mason, R. A. B., Ellis, W. R., Cunning, R., & Gates, R. D. (2017). Elevated pCO<sub>2</sub>

Wall et al., *submitted*

- 1057 affects tissue biomass composition, but not calcification, in a reef coral under two light  
1058 regimes. *Royal Society Open Science*, 4(11), 170683. doi: 10.1098/rsos.170683
- 1059 Wall, C. B., Ricci, C. A., Foulds, G. E., Mydlarz, L. D., Gates, R. D., & Putnam, H. M. (2018).  
1060 The effects of environmental history and thermal stress on coral physiology and immunity.  
1061 *Marine Biology*, Vol. 165. doi: 10.1007/s00227-018-3317-z
- 1062 Wall, C. B., Ritson-Williams, R., Popp, B. N., & Gates, R. D. (2019). Spatial variation in the  
1063 biochemical and isotopic composition of corals during bleaching and recovery. *Limnology  
1064 and Oceanography*, 64(5), 2011–2028. doi: 10.1002/lno.11166
- 1065 Weis, V. M. (2008). Cellular mechanisms of Cnidarian bleaching: stress causes the collapse of  
1066 symbiosis. *The Journal of Experimental Biology*, 211(Pt 19), 3059–3066. doi:  
1067 10.1242/jeb.009597
- 1068 Wham, D. C., Ning, G., & LaJeunesse, T. C. (2017). *Symbiodinium glynnii* sp. nov., a species of  
1069 stress-tolerant symbiotic dinoflagellates from pocilloporid and montiporid corals in the  
1070 Pacific Ocean. *Phycologia*, 56, 396–409. doi: 10.2216/16-86.1

1071
